# Supplementary material for: Height, body mass index, and socioeconomic status: mendelian randomisation study in UK Biobank
Source: PubMed Central journal article supplement (PMC4783516; doi:10.1136/bmj.i582), 2016-03-08
Supplement: tyrj029564.ww1_default.pdf [file tyrj029564.ww1_default.pdf]

## Supplementary Information

### Supplementary Methods

#### *UK Biobank Quality Control*

The UK Biobank performed extensive quality control on the genetic data including the exclusion of the majority of third degree or closer relatives from a genetic kinship analysis of 96% of individuals. We performed an additional round of principal components analysis on these 120,286 UK Biobank participants. We selected 95,535 independent single nucleotide polymorphisms (pairwise  $r^2 < 0.1$ ) directly genotyped with a minor allele frequency  $\geq 2.5\%$  and missingness  $< 1.5\%$  across all UK Biobank participants with genetic data available at the time of this study ( $n=152,732$ ), and with Hardy-Weinberg  $P > 1 \times 10^{-6}$  within the white British participants. Principal components were subsequently generated using FlashPCA (1) and the first five adjusted for in all analyses.

**Power calculation:** To assess the power of our study, we calculated the approximate number of individuals we would need to detect the expected effect given the gene score – height/BMI associations and the height/BMI-socioeconomic status measure associations: Townsend deprivation index, income, degree level education or job class associations. We used the product of the variance explained by the instrumental variable-height or BMI association and the height or BMI – socioeconomic status associations and a range of P values including 0.05, 0.01 and 0.001 to determine the numbers required to have at least 80% power.

**Supplementary table A: Comparison of key demographics for individuals reporting or not reporting each socioeconomic status measure**

| <b>Demographic variable</b>              | <b>Data available</b> | <b>Data missing</b> | <b>P<sup>^</sup></b> |
|------------------------------------------|-----------------------|---------------------|----------------------|
| <b>Age completed full time education</b> |                       |                     |                      |
| N                                        | 82,543                | 37,126              |                      |
| Age at recruitment in years (SD)         | 57.5 (7.9)            | 55.6 (7.9)          | <1E-15               |
| Male, N (%)                              | 38,342 (46.5)         | 18,310 (49.3)       | <0.001               |
| Mean height in m (SD)                    | 168 (9)               | 170 (9)             | <1E-15               |
| Mean BMI in kgm-2 (SD)                   | 27.9 (4.9)            | 26.7 (4.5)          | <1E-15               |
| <b>Degree level education</b>            |                       |                     |                      |
| N                                        | 118,565               | 1,104               |                      |
| Age at recruitment in years (SD)         | 56.9 (7.9)            | 59.6 (7.5)          | <1E-15               |
| Male, N (%)                              | 56,111 (47.3)         | 541 (49.0)          | 0.27                 |
| Mean height in m (SD)                    | 169 (9)               | 167 (9)             | 1.00E-11             |
| Mean BMI in kgm-2 (SD)                   | 27.5 (4.8)            | 28.2 (5.0)          | 3.00E-05             |
| <b>Job class</b>                         |                       |                     |                      |
| N                                        | 76,404                | 43,265              |                      |
| Age at recruitment in years (SD)         | 54.4 (7.6)            | 61.4 (6.3)          | <1E-15               |
| Male, N (%)                              | 37,608 (49.2)         | 19,044 (44.0)       | <0.001               |
| Mean height in m (SD)                    | 170 (9)               | 167 (9)             | <1E-15               |
| Mean BMI in kgm-2 (SD)                   | 27.4 (4.7)            | 27.7 (5.0)          | 3.00E-15             |
| <b>Income</b>                            |                       |                     |                      |
| N                                        | 103,327               | 16,342              |                      |
| Age at recruitment in years (SD)         | 56.5 (8.0)            | 59.3 (7.4)          | <1E-15               |
| Male, N (%)                              | 50,862 (49.2)         | 5,790 (35.4)        | <0.001               |
| Mean height in m (SD)                    | 169 (9)               | 166 (9)             | <1E-15               |
| Mean BMI in kgm-2 (SD)                   | 27.5 (4.8)            | 27.6 (5.0)          | 2.00E-05             |
| <b>Townsend deprivation index</b>        |                       |                     |                      |
| N                                        | 119,519               | 150                 |                      |
| Age at recruitment in years (SD)         | 56.9 (7.9)            | 55.3 (8.0)          | 0.015                |
| Male, N (%)                              | 56,582 (47.3)         | 70 (46.7)           | 0.87                 |
| Mean height in m (SD)                    | 169 (9.2)             | 169 (8.9)           | 0.51                 |
| Mean BMI in kgm-2 (SD)                   | 27.5 (4.8)            | 27.8 (5.4)          | 0.43                 |

<sup>^</sup> P values represent age and sex adjusted comparisons of the two groups of individuals with and without data available.

**Supplementary table B: Associations between the 5 socioeconomic status markers and a range of health outcomes in the UK Biobank**

| Disease                 | socioeconomic status measure      | N cases (controls) | Odds ratio for disease in the UK Biobank per SD higher socioeconomic status (95% CI)^ | p         |
|-------------------------|-----------------------------------|--------------------|---------------------------------------------------------------------------------------|-----------|
| Coronary artery disease | Age completed full time education | 4670 (77890)       | 0.85 (0.82, 0.88)                                                                     | 7.00E-25  |
| Hypertension            |                                   | 47915 (34151)      | 0.96 (0.94, 0.97)                                                                     | 3.00E-08  |
| Long illness            |                                   | 28515 (51982)      | 0.91 (0.89, 0.92)                                                                     | 8.00E-37  |
| Type 2 diabetes         |                                   | 3144 (77544)       | 1.00 (0.96, 1.03)                                                                     | 8.10E-01  |
| Coronary artery disease | Degree                            | 5663 (112921)      | 0.62 (0.59, 0.66)                                                                     | 1.00E-55  |
| Hypertension            |                                   | 64881 (53040)      | 0.81 (0.79, 0.83)                                                                     | 9.00E-63  |
| Long illness            |                                   | 38872 (77100)      | 0.87 (0.85, 0.89)                                                                     | 3.00E-27  |
| Type 2 diabetes         |                                   | 3958 (112185)      | 0.81 (0.76, 0.87)                                                                     | 3.00E-09  |
| Coronary artery disease | Job class                         | 2280 (74133)       | 0.71 (0.65, 0.78)                                                                     | 6.00E-14  |
| Hypertension            |                                   | 37446 (38507)      | 0.80 (0.77, 0.83)                                                                     | 1.00E-34  |
| Long illness            |                                   | 20712 (54147)      | 0.86 (0.83, 0.89)                                                                     | 2.00E-16  |
| Type 2 diabetes         |                                   | 1914 (73217)       | 0.98 (0.89, 1.08)                                                                     | 6.90E-01  |
| Coronary artery disease | Income                            | 4778 (98563)       | 0.73 (0.71, 0.76)                                                                     | 2.00E-76  |
| Hypertension            |                                   | 55864 (46947)      | 0.93 (0.91, 0.94)                                                                     | 5.00E-28  |
| Long illness            |                                   | 33431 (67856)      | 0.74 (0.73, 0.75)                                                                     | <1E-15    |
| Type 2 diabetes         |                                   | 3420 (97860)       | 0.83 (0.80, 0.86)                                                                     | 6.00E-23  |
| Coronary artery disease | Townsend deprivation index        | 5752 (113786)      | 0.78 (0.76, 0.80)                                                                     | 4.00E-68  |
| Hypertension            |                                   | 65499 (53314)      | 0.96 (0.95, 0.98)                                                                     | 5.00E-09  |
| Long illness            |                                   | 39239 (77617)      | 0.80 (0.79, 0.81)                                                                     | 2.00E-158 |
| Type 2 diabetes         |                                   | 3998 (113062)      | 0.86 (0.83, 0.89)                                                                     | 9.00E-19  |

^ adjusted for age, sex and BMI

**Supplementary table C: Summary of the body mass index (BMI) and height variants previously identified as associated with those traits at genome wide significance**

| Trait | Genetic variant | Locus           | Exclude from score | Reason for exclusion                                                                                                    | Trait raising allele | Trait lowering allele | Directly genotyped or Imputed | Imputation quality | Beta representing SD change in BMI or height for each SNP in UK Biobank data | P value  |
|-------|-----------------|-----------------|--------------------|-------------------------------------------------------------------------------------------------------------------------|----------------------|-----------------------|-------------------------------|--------------------|------------------------------------------------------------------------------|----------|
| BMI   | rs1000940       | <i>RABEP1</i>   | No                 | NA                                                                                                                      | G                    | A                     | Imputed                       | 0.99624            | 0.011<br>(0.004)                                                             | 1.60E-02 |
| BMI   | rs10132280      | <i>STXBP6</i>   | No                 | NA                                                                                                                      | C                    | A                     | Imputed                       | 0.97496            | 0.020<br>(0.005)                                                             | 1.10E-05 |
| BMI   | rs1016287       | <i>FLJ30838</i> | No                 | NA                                                                                                                      | T                    | C                     | Imputed                       | 0.99411            | 0.019<br>(0.004)                                                             | 2.00E-05 |
| BMI   | rs10182181      | <i>ADCY3</i>    | No                 | NA                                                                                                                      | G                    | A                     | Imputed                       | 0.99521            | 0.033<br>(0.004)                                                             | 1.40E-15 |
| BMI   | rs10733682      | <i>LMX1B</i>    | No                 | NA                                                                                                                      | A                    | G                     | Imputed                       | 0.9576             | 0.019<br>(0.004)                                                             | 5.90E-06 |
| BMI   | rs10938397      | <i>GNPDA2</i>   | No                 | NA                                                                                                                      | G                    | A                     | Imputed                       | 1                  | 0.030<br>(0.004)                                                             | 5.80E-13 |
| BMI   | rs10968576      | <i>LINGO2</i>   | No                 | NA                                                                                                                      | G                    | A                     | Imputed                       | 1                  | 0.024<br>(0.004)                                                             | 6.90E-08 |
| BMI   | rs11030104      | <i>BDNF</i>     | Yes                | BMI-raising allele also associated with regular smoking (which itself has a causal effect on BMI in opposite direction) | A                    | G                     | Imputed                       | 0.99931            | NA                                                                           | NA       |
| BMI   | rs11057405      | <i>CLIP1</i>    | No                 | NA                                                                                                                      | G                    | A                     | Imputed                       | 1                  | 0.030<br>(0.007)                                                             | 4.70E-06 |
| BMI   | rs11126666      | <i>KCNK3</i>    | No                 | NA                                                                                                                      | A                    | G                     | Imputed                       | 0.99485            | 0.002<br>(0.005)                                                             | 7.10E-01 |
| BMI   | rs11165643      | <i>PTBP2</i>    | No                 | NA                                                                                                                      | T                    | C                     | Imputed                       | 0.99575            | 0.016<br>(0.004)                                                             | 9.50E-05 |
| BMI   | rs11191560      | <i>NT5C2</i>    | No                 | NA                                                                                                                      | C                    | T                     | Imputed                       | 0.99989            | 0.026<br>(0.008)                                                             | 6.50E-04 |

|     |            |                         |     |                                                                                                                                                                                                                   |   |   |         |         |                   |          |
|-----|------------|-------------------------|-----|-------------------------------------------------------------------------------------------------------------------------------------------------------------------------------------------------------------------|---|---|---------|---------|-------------------|----------|
| BMI | rs11583200 | <i>ELAVL4</i>           | No  | NA                                                                                                                                                                                                                | C | T | Imputed | 0.98728 | 0.019<br>(0.004)  | 7.70E-06 |
| BMI | rs1167827  | <i>HIP1</i>             | No  | NA                                                                                                                                                                                                                | G | A | Imputed | 1       | 0.020<br>(0.004)  | 1.80E-06 |
| BMI | rs11688816 | <i>EHBP1</i>            | No  | NA                                                                                                                                                                                                                | G | A | Imputed | 0.98096 | 0.014<br>(0.004)  | 9.40E-04 |
| BMI | rs11727676 | <i>HHIP</i>             | No  | NA                                                                                                                                                                                                                | T | C | Imputed | 1       | -0.003<br>(0.007) | 6.60E-01 |
| BMI | rs11847697 | <i>PRKD1</i>            | No  | NA                                                                                                                                                                                                                | T | C | Imputed | 1       | 0.014<br>(0.010)  | 1.70E-01 |
| BMI | rs12286929 | <i>CADMI</i>            | No  | NA                                                                                                                                                                                                                | G | A | Imputed | 0.99124 | 0.010<br>(0.004)  | 1.20E-02 |
| BMI | rs12401738 | <i>FUBP1</i>            | No  | NA                                                                                                                                                                                                                | A | G | Imputed | 0.99528 | 0.012<br>(0.004)  | 3.30E-03 |
| BMI | rs12429545 | <i>OLFM4</i>            | No  | NA                                                                                                                                                                                                                | A | G | Imputed | 0.97759 | 0.027<br>(0.006)  | 8.00E-06 |
| BMI | rs12446632 | <i>GPRC5B</i>           | No  | NA                                                                                                                                                                                                                | G | A | Imputed | 0.99978 | 0.028<br>(0.006)  | 2.40E-06 |
| BMI | rs12566985 | <i>FPGT-<br/>TNNI3K</i> | No  | NA                                                                                                                                                                                                                | G | A | Imputed | 0.9947  | 0.011<br>(0.004)  | 6.10E-03 |
| BMI | rs12885454 | <i>PRKD1</i>            | No  | NA                                                                                                                                                                                                                | C | A | Imputed | 0.99569 | 0.015<br>(0.004)  | 4.60E-04 |
| BMI | rs12940622 | <i>RPTOR</i>            | No  | NA                                                                                                                                                                                                                | G | A | Imputed | 0.99796 | 0.017<br>(0.004)  | 5.90E-05 |
| BMI | rs13021737 | <i>TMEM18</i>           | No  | NA                                                                                                                                                                                                                | G | A | Imputed | 0.99072 | 0.059<br>(0.005)  | 9.10E-27 |
| BMI | rs13078960 | <i>CADM2</i>            | No  | NA                                                                                                                                                                                                                | G | T | Imputed | 0.9915  | 0.024<br>(0.005)  | 2.50E-06 |
| BMI | rs13107325 | <i>SLC39A8</i>          | Yes | Missense Ala/Thr<br>polymorphism located<br>in exon 7 of<br>SLC39A8, which<br>encodes a zinc<br>transporter that also<br>transports cadmium<br>and manganese. It is<br>also associated with<br>BP and HDL levels, | T | C | Imputed | 1       | NA                | NA       |

and presumably these  
and the BMI effect are  
secondary to the metal  
ion transport variation.

|     |            |                 |     |                                           |   |   |         |         |                  |          |
|-----|------------|-----------------|-----|-------------------------------------------|---|---|---------|---------|------------------|----------|
| BMI | rs13191362 | <i>PARK2</i>    | No  | NA                                        | A | G | Imputed | 0.98973 | 0.026<br>(0.006) | 3.10E-05 |
| BMI | rs1516725  | <i>ETV5</i>     | No  | NA                                        | C | T | Imputed | 0.99495 | 0.032<br>(0.006) | 1.00E-07 |
| BMI | rs1528435  | <i>UBE2E3</i>   | No  | NA                                        | T | C | Imputed | 0.99738 | 0.014<br>(0.004) | 6.60E-04 |
| BMI | rs1558902  | <i>FTO</i>      | No  | NA                                        | A | T | Imputed | 0.99914 | 0.077<br>(0.004) | 1.50E-75 |
| BMI | rs16851483 | <i>RASA2</i>    | No  | NA                                        | T | G | Imputed | 0.99906 | 0.028<br>(0.008) | 6.80E-04 |
| BMI | rs16951275 | <i>MAP2K5</i>   | No  | NA                                        | T | C | Imputed | 0.99819 | 0.032<br>(0.005) | 4.40E-11 |
| BMI | rs17001654 | <i>SCARB2</i>   | Yes | SNP not in Hardy-<br>Weinberg equilibrium | G | C | Imputed | 0.9483  | NA               | NA       |
| BMI | rs17024393 | <i>GNAT2</i>    | No  | NA                                        | C | T | Imputed | 0.98934 | 0.074<br>(0.013) | 1.20E-08 |
| BMI | rs17094222 | <i>HIF1AN</i>   | No  | NA                                        | C | T | Imputed | 0.96874 | 0.013<br>(0.005) | 8.50E-03 |
| BMI | rs17405819 | <i>HNF4G</i>    | No  | NA                                        | T | C | Imputed | 0.99793 | 0.014<br>(0.004) | 1.30E-03 |
| BMI | rs17724992 | <i>PGPEP1</i>   | No  | NA                                        | A | G | Imputed | 0.98342 | 0.023<br>(0.005) | 1.10E-06 |
| BMI | rs1808579  | <i>C18orf8</i>  | No  | NA                                        | C | T | Imputed | 0.99797 | 0.022<br>(0.004) | 1.50E-07 |
| BMI | rs1928295  | <i>TLR4</i>     | No  | NA                                        | T | C | Imputed | 0.99998 | 0.010<br>(0.004) | 1.60E-02 |
| BMI | rs2033529  | <i>TDRG1</i>    | Yes | SNP not available                         | G | A | NA      | NA      | NA               | NA       |
| BMI | rs2033732  | <i>RALYL</i>    | No  | NA                                        | C | T | Imputed | 1       | 0.002<br>(0.005) | 6.70E-01 |
| BMI | rs205262   | <i>C6orf106</i> | No  | NA                                        | G | A | Imputed | 0.9968  | 0.028<br>(0.005) | 1.10E-09 |
| BMI | rs2075650  | <i>TOMM40</i>   | Yes | SNP not in Hardy-<br>Weinberg equilibrium | A | G | Imputed | 0.9865  | NA               | NA       |
| BMI | rs2112347  | <i>POC5</i>     | No  | NA                                        | T | G | Imputed | 1       | 0.026            | 6.30E-10 |

|     |           |                 |     |                                                             |   |   |         |         |                  |          |
|-----|-----------|-----------------|-----|-------------------------------------------------------------|---|---|---------|---------|------------------|----------|
| BMI | rs2121279 | <i>LRP1B</i>    | No  | NA                                                          | T | C | Imputed | 0.98723 | (0.004)<br>0.006 | 3.70E-01 |
| BMI | rs2176598 | <i>HSD17B12</i> | No  | NA                                                          | T | C | Imputed | 1       | (0.006)<br>0.023 | 1.30E-06 |
| BMI | rs2207139 | <i>TFAP2B</i>   | No  | NA                                                          | G | A | Imputed | 0.9989  | (0.005)<br>0.038 | 1.80E-12 |
| BMI | rs2245368 | <i>PMS2L11</i>  | No  | NA                                                          | C | T | Imputed | 1       | (0.005)<br>0.022 | 8.00E-05 |
| BMI | rs2287019 | <i>QPCTL</i>    | No  | NA                                                          | C | T | Imputed | 0.97852 | (0.005)<br>0.035 | 1.00E-10 |
| BMI | rs2365389 | <i>FHIT</i>     | No  | NA                                                          | C | T | Imputed | 0.99305 | (0.005)<br>0.029 | 2.70E-12 |
| BMI | rs2650492 | <i>SBK1</i>     | No  | NA                                                          | A | G | Imputed | 0.98144 | (0.004)<br>0.019 | 3.60E-05 |
| BMI | rs2820292 | <i>NAVI</i>     | No  | NA                                                          | C | A | Imputed | 1       | (0.005)<br>0.019 | 3.60E-06 |
| BMI | rs29941   | <i>KCTD15</i>   | No  | NA                                                          | G | A | Imputed | 1       | (0.004)<br>0.018 | 5.00E-05 |
| BMI | rs3101336 | <i>NEGR1</i>    | No  | NA                                                          | C | T | Imputed | 1       | (0.004)<br>0.027 | 9.50E-11 |
| BMI | rs3736485 | <i>DMXL2</i>    | No  | NA                                                          | A | G | Imputed | 0.98728 | (0.004)<br>0.011 | 6.40E-03 |
| BMI | rs3810291 | <i>ZC3H4</i>    | No  | NA                                                          | A | G | Imputed | 1       | (0.004)<br>0.028 | 1.80E-10 |
| BMI | rs3817334 | <i>MTCH2</i>    | No  | NA                                                          | T | C | Imputed | 1       | (0.004)<br>0.031 | 1.40E-13 |
| BMI | rs3849570 | <i>GBE1</i>     | No  | NA                                                          | A | C | Imputed | 0.99509 | (0.004)<br>0.011 | 7.80E-03 |
| BMI | rs3888190 | <i>ATP2A1</i>   | Yes | Associated with lots of other traits and is a big haplotype | A | C | Imputed | 0.99808 | (0.004)<br>NA    | NA       |
| BMI | rs4256980 | <i>TRIM66</i>   | No  | NA                                                          | G | C | Imputed | 0.99283 | (0.004)<br>0.021 | 1.70E-06 |
| BMI | rs4740619 | <i>C9orf93</i>  | No  | NA                                                          | T | C | Imputed | 0.99762 | (0.004)<br>0.017 | 5.70E-05 |
| BMI | rs543874  | <i>SEC16B</i>   | No  | NA                                                          | G | A | Imputed | 1       | (0.005)<br>0.049 | 3.40E-22 |

|        |            |                 |     |                                       |   |   |         |         |                  |          |
|--------|------------|-----------------|-----|---------------------------------------|---|---|---------|---------|------------------|----------|
| BMI    | rs6477694  | <i>EPB41LAB</i> | No  | NA                                    | C | T | Imputed | 0.99022 | 0.008<br>(0.004) | 6.70E-02 |
| BMI    | rs6567160  | <i>MC4R</i>     | No  | NA                                    | C | T | Imputed | 0.99663 | 0.054<br>(0.005) | 9.50E-29 |
| BMI    | rs657452   | <i>AGBL4</i>    | No  | NA                                    | A | G | Imputed | 0.98709 | 0.014<br>(0.004) | 8.40E-04 |
| BMI    | rs6804842  | <i>RARB</i>     | No  | NA                                    | G | A | Imputed | 0.98778 | 0.009<br>(0.004) | 3.20E-02 |
| BMI    | rs7138803  | <i>BCDIN3D</i>  | No  | NA                                    | A | G | Imputed | 1       | 0.034<br>(0.004) | 1.30E-15 |
| BMI    | rs7141420  | <i>NRXN3</i>    | No  | NA                                    | T | C | Imputed | 0.98379 | 0.019<br>(0.004) | 6.70E-06 |
| BMI    | rs7243357  | <i>GRP</i>      | No  | NA                                    | T | G | Imputed | 0.98998 | 0.012<br>(0.005) | 2.10E-02 |
| BMI    | rs758747   | <i>NLRC3</i>    | No  | NA                                    | T | C | Imputed | 0.97187 | 0.014<br>(0.005) | 2.00E-03 |
| BMI    | rs7599312  | <i>ERBB4</i>    | No  | NA                                    | G | A | Imputed | 0.97294 | 0.019<br>(0.005) | 3.60E-05 |
| BMI    | rs7899106  | <i>GRID1</i>    | No  | NA                                    | G | A | Imputed | 0.98612 | 0.023<br>(0.009) | 1.40E-02 |
| BMI    | rs9400239  | <i>FOXO3</i>    | No  | NA                                    | C | T | Imputed | 0.99206 | 0.017<br>(0.005) | 2.30E-04 |
| BMI    | rs9581854  | <i>MTIF3</i>    | No  | NA                                    | T | C | Imputed | 0.98643 | 0.015<br>(0.005) | 6.20E-03 |
| BMI    | rs9925964  | <i>KAT8</i>     | Yes | SNP not in Hardy-Weinberg equilibrium | A | G | Imputed | 1       |                  |          |
| Height | rs10083886 | <i>SOX9</i>     | No  | NA                                    | T | C | Imputed | 0.96954 | 0.021<br>(0.005) | 1E-05    |
| Height | rs10131337 | <i>PAX9</i>     | No  | NA                                    | T | C | Imputed | 0.98303 | 0.026<br>(0.005) | 6E-08    |
| Height | rs10152739 | <i>SPRED1</i>   | No  | NA                                    | T | A | Imputed | 0.9879  | 0.016<br>(0.005) | 7E-04    |
| Height | rs1036477  | <i>FBN1</i>     | No  | NA                                    | A | G | Imputed | 0.9957  | 0.029<br>(0.007) | 2E-05    |
| Height | rs1036821  | <i>ZFAT</i>     | No  | NA                                    | G | A | Imputed | 0.97861 | 0.042<br>(0.004) | 1E-20    |
| Height | rs1047014  | <i>ID4</i>      | No  | NA                                    | C | T | Imputed | 1       | 0.028            | 4E-09    |



|        |            |                 |    |    |   |   |         |         |                  |       |
|--------|------------|-----------------|----|----|---|---|---------|---------|------------------|-------|
| Height | rs1055144  | <i>NFE2L3</i>   | No | NA | T | C | Imputed | 1       | (0.005)<br>0.029 | 2E-08 |
| Height | rs1074683  | <i>PXMP4</i>    | No | NA | C | G | Imputed | 0.99541 | (0.005)<br>0.042 | 4E-19 |
| Height | rs10748128 | <i>FRS2</i>     | No | NA | T | G | Imputed | 1       | (0.005)<br>0.032 | 6E-14 |
| Height | rs10767838 | <i>C11orf46</i> | No | NA | A | G | Imputed | 0.99185 | (0.004)<br>0.011 | 2E-02 |
| Height | rs10770705 | <i>SLCO1C1</i>  | No | NA | A | C | Imputed | 1       | (0.005)<br>0.022 | 3E-07 |
| Height | rs10779751 | <i>FRAP1</i>    | No | NA | A | G | Imputed | 1       | (0.004)<br>0.017 | 2E-04 |
| Height | rs10780910 | <i>SPIN1</i>    | No | NA | T | A | Imputed | 0.98414 | (0.005)<br>0.028 | 2E-11 |
| Height | rs10790381 | <i>ARHGEF12</i> | No | NA | A | G | Imputed | 0.99606 | (0.004)<br>0.029 | 9E-08 |
| Height | rs10794175 | <i>FAM53B</i>   | No | NA | T | G | Imputed | 0.99344 | (0.005)<br>0.018 | 9E-06 |
| Height | rs10863936 | <i>DTL</i>      | No | NA | G | A | Imputed | 1       | (0.004)<br>0.019 | 4E-06 |
| Height | rs10877030 | <i>CTDSP2</i>   | No | NA | T | G | Imputed | 0.98828 | (0.004)<br>0.033 | 2E-14 |
| Height | rs10880969 | <i>SLC38A2</i>  | No | NA | C | T | Imputed | 0.99792 | (0.004)<br>0.029 | 6E-11 |
| Height | rs10883563 | <i>FAM178A</i>  | No | NA | A | C | Imputed | 1       | (0.004)<br>0.024 | 3E-09 |
| Height | rs10948222 | <i>SUPT3H</i>   | No | NA | C | T | Imputed | 0.99409 | (0.004)<br>0.014 | 6E-04 |
| Height | rs10995319 | <i>PRKG1</i>    | No | NA | T | C | Imputed | 0.9964  | (0.005)<br>0.019 | 1E-04 |
| Height | rs10997979 | <i>MYPN</i>     | No | NA | G | A | Imputed | 0.99812 | (0.005)<br>0.030 | 3E-13 |
| Height | rs11047239 | <i>SOX5</i>     | No | NA | G | C | Imputed | 0.99285 | (0.004)<br>0.025 | 1E-08 |
| Height | rs11049611 | <i>CCDC91</i>   | No | NA | C | T | Imputed | 0.99616 | (0.004)<br>0.041 | 1E-20 |
| Height | rs1113765  | <i>SEPT14</i>   | No | NA | G | A | Imputed | 0.98428 | (0.004)<br>0.015 | 6E-03 |

|        |            |                 |     |                                |    |   |         |         |                   |                  |
|--------|------------|-----------------|-----|--------------------------------|----|---|---------|---------|-------------------|------------------|
| Height | rs11144688 | <i>PCSK5</i>    | No  | NA                             | G  | A | Imputed | 1       | (0.005)<br>0.051  | 4E-16            |
| Height | rs11152213 | <i>MC4R</i>     | No  | NA                             | C  | A | Imputed | 0.99902 | (0.006)<br>0.034  | 3E-12            |
| Height | rs11156098 | <i>ARID1B</i>   | No  | NA                             | T  | C | Imputed | 0.97473 | (0.005)<br>0.024  | 4E-04            |
| Height | rs11221442 | <i>FLII</i>     | No  | NA                             | G  | C | Imputed | 0.99462 | (0.007)<br>-0.005 | 3E-01            |
| Height | rs1155939  | <i>C6orf173</i> | No  | NA                             | A  | C | Imputed | 0.99833 | (0.005)<br>0.048  | 2E-32            |
| Height | rs11612228 | <i>B4GALNT3</i> | No  | NA                             | T  | C | Imputed | 0.96996 | (0.004)<br>0.036  | 1E-16            |
| Height | rs11616067 | <i>MED13L</i>   | No  | NA                             | A  | G | Imputed | 1       | (0.004)<br>0.018  | 1E-04            |
| Height | rs11616380 | <i>SPRY2</i>    | No  | NA                             | T  | G | Imputed | 0.98577 | (0.005)<br>0.014  | 3E-03            |
| Height | rs11618507 | <i>SLC7A1</i>   | No  | NA                             | T  | G | Imputed | 0.99005 | (0.005)<br>0.013  | 8E-03            |
| Height | rs11624136 | <i>DAAMI</i>    | No  | NA                             | A  | G | Imputed | 0.99632 | (0.005)<br>0.013  | 1E-03            |
| Height | rs11640018 | <i>CFDP1</i>    | No  | NA                             | C  | T | Imputed | 1       | (0.004)<br>0.010  | 1E-02            |
| Height | rs11642612 | <i>FLJ25404</i> | No  | NA                             | C  | A | Imputed | 0.99914 | (0.004)<br>0.017  | 4E-05            |
| Height | rs11648796 | <i>NARFL</i>    | No  | NA                             | G  | A | Imputed | 0.90086 | (0.005)<br>0.045  | 3E-18            |
| Height | rs11659752 | <i>NFATC1</i>   | No  | NA                             | T  | G | Imputed | 0.99007 | (0.004)<br>0.022  | 1E-06            |
| Height | rs11683207 | <i>ZAP70</i>    | Yes | Imputation r <sup>2</sup> <0.9 | T  | C | NA      | NA      | NA                | NA               |
| Height | rs11684404 | <i>EIF2AK3</i>  | No  |                                | NA | C | T       | Imputed | 0.99855           | (0.004)<br>0.036 |
| Height | rs11687941 | <i>HDLBP</i>    | No  | NA                             | C  | G | Imputed | 0.99945 | (0.005)<br>0.021  | 1E-05            |
| Height | rs1171615  | <i>SLC16A9</i>  | No  | NA                             | C  | T | Imputed | 0.99323 | (0.005)<br>0.031  | 1E-10            |
| Height | rs11750568 | <i>ADAMTS2</i>  | No  | NA                             | A  | G | Imputed | 0.99518 | (0.004)<br>0.016  | 2E-04            |

|        |            |                |    |    |   |   |         |         |                  |       |
|--------|------------|----------------|----|----|---|---|---------|---------|------------------|-------|
| Height | rs11783655 | <i>PLEC1</i>   | No | NA | T | A | Imputed | 0.98049 | 0.031<br>(0.004) | 2E-13 |
| Height | rs11799609 | <i>SDCCAG8</i> | No | NA | T | G | Imputed | 0.98286 | 0.012<br>(0.006) | 4E-02 |
| Height | rs11835818 | <i>BCL7A</i>   | No | NA | C | T | Imputed | 0.98771 | 0.015<br>(0.004) | 2E-04 |
| Height | rs11855014 | <i>PDE8A</i>   | No | NA | G | A | Imputed | 0.97241 | 0.013<br>(0.004) | 4E-03 |
| Height | rs11867479 | <i>KCNJ16</i>  | No | NA | T | C | Imputed | 1       | 0.030<br>(0.004) | 3E-12 |
| Height | rs11880992 | <i>DOTIL</i>   | No | NA | A | G | Imputed | 0.99401 | 0.039<br>(0.004) | 2E-20 |
| Height | rs1199734  | <i>LATS2</i>   | No | NA | G | T | Imputed | 0.99442 | 0.028<br>(0.005) | 2E-07 |
| Height | rs12120956 | <i>CAPZAI</i>  | No | NA | G | A | Imputed | 1       | 0.021<br>(0.005) | 2E-05 |
| Height | rs12137162 | <i>CAPZB</i>   | No | NA | A | C | Imputed | 1       | 0.022<br>(0.005) | 2E-06 |
| Height | rs12186664 | <i>PCSKI</i>   | No | NA | T | A | Imputed | 0.9915  | 0.013<br>(0.004) | 2E-03 |
| Height | rs12190423 | <i>OGFRL1</i>  | No | NA | G | C | Imputed | 0.98213 | 0.016<br>(0.004) | 3E-04 |
| Height | rs12209223 | <i>FILIP1</i>  | No | NA | A | C | Imputed | 0.98097 | 0.046<br>(0.007) | 2E-11 |
| Height | rs12214804 | <i>HMGA1</i>   | No | NA | C | T | Imputed | 0.99476 | 0.091<br>(0.007) | 3E-36 |
| Height | rs12323101 | <i>PDS5B</i>   | No | NA | A | G | Imputed | 0.99874 | 0.018<br>(0.004) | 2E-05 |
| Height | rs12330322 | <i>RYBP</i>    | No | NA | C | T | Imputed | 0.99412 | 0.034<br>(0.005) | 8E-12 |
| Height | rs1233627  | <i>TRIM27</i>  | No | NA | T | C | Imputed | 0.99851 | 0.023<br>(0.004) | 3E-08 |
| Height | rs12435366 | <i>NFKBIA</i>  | No | NA | C | T | Imputed | 0.98427 | 0.010<br>(0.005) | 5E-02 |
| Height | rs12470505 | <i>CCDC108</i> | No | NA | T | G | Imputed | 1       | 0.048<br>(0.007) | 3E-12 |
| Height | rs12474201 | <i>SOCS5</i>   | No | NA | A | G | Imputed | 1       | 0.032<br>(0.004) | 1E-13 |

|        |            |                |    |    |   |   |         |         |                  |       |
|--------|------------|----------------|----|----|---|---|---------|---------|------------------|-------|
| Height | rs12513181 | <i>NUDT6</i>   | No | NA | C | A | Imputed | 0.99914 | 0.020<br>(0.005) | 1E-05 |
| Height | rs12519505 | <i>AP3B1</i>   | No | NA | C | T | Imputed | 0.99272 | 0.022<br>(0.005) | 6E-06 |
| Height | rs12538407 | <i>IGF2BP3</i> | No | NA | A | G | Imputed | 0.99068 | 0.036<br>(0.004) | 6E-18 |
| Height | rs12639764 | <i>TET2</i>    | No | NA | T | C | Imputed | 0.98841 | 0.031<br>(0.004) | 3E-13 |
| Height | rs12669267 | <i>WBSCR28</i> | No | NA | C | T | Imputed | 0.97258 | 0.028<br>(0.006) | 7E-06 |
| Height | rs12693589 | <i>STAT1</i>   | No | NA | C | T | Imputed | 0.98669 | 0.021<br>(0.005) | 9E-06 |
| Height | rs12779328 | <i>CCDC3</i>   | No | NA | C | T | Imputed | 0.99272 | 0.035<br>(0.005) | 1E-14 |
| Height | rs12855    | <i>CDKN2C</i>  | No | NA | T | C | Imputed | 1       | 0.060<br>(0.007) | 4E-17 |
| Height | rs12882130 | <i>MARK3</i>   | No | NA | C | G | Imputed | 0.95464 | 0.024<br>(0.004) | 1E-08 |
| Height | rs12904334 | <i>ARIHI</i>   | No | NA | A | G | Imputed | 1       | 0.068<br>(0.017) | 7E-05 |
| Height | rs12987566 | <i>METTL8</i>  | No | NA | T | C | Imputed | 0.99346 | 0.026<br>(0.005) | 4E-08 |
| Height | rs13006748 | <i>WDR35</i>   | No | NA | C | G | Imputed | 0.96536 | 0.003<br>(0.005) | 6E-01 |
| Height | rs13088462 | <i>DOCK3</i>   | No | NA | C | T | Imputed | 1       | 0.060<br>(0.009) | 2E-10 |
| Height | rs13113518 | <i>CLOCK</i>   | No | NA | C | T | Imputed | 0.99849 | 0.016<br>(0.004) | 2E-04 |
| Height | rs13150868 | <i>ESSPL</i>   | No | NA | T | G | Imputed | 0.99747 | 0.012<br>(0.004) | 4E-03 |
| Height | rs13177718 | <i>FER</i>     | No | NA | C | T | Imputed | 1       | 0.031<br>(0.008) | 7E-05 |
| Height | rs1325596  | <i>PAPPA2</i>  | No | NA | A | G | Imputed | 1       | 0.029<br>(0.004) | 3E-12 |
| Height | rs1326023  | <i>MC3R</i>    | No | NA | A | G | Imputed | 0.98457 | 0.012<br>(0.005) | 8E-03 |
| Height | rs13388725 | <i>GCC2</i>    | No | NA | G | A | Imputed | 0.99389 | 0.008<br>(0.004) | 7E-02 |

|        |            |                 |     |                                       |   |   |         |         |                  |        |
|--------|------------|-----------------|-----|---------------------------------------|---|---|---------|---------|------------------|--------|
| Height | rs13416119 | <i>EML4</i>     | No  | NA                                    | A | G | Imputed | 0.98764 | 0.024<br>(0.007) | 9E-04  |
| Height | rs1401795  | <i>C17orf67</i> | Yes | SNP not in Hardy-Weinberg equilibrium | A | G | NA      | NA      | NA               | NA     |
| Height | rs1405212  | <i>VGLL2</i>    | No  | NA                                    | C | T | Imputed | 0.9969  | 0.027<br>(0.004) | 2E-10  |
| Height | rs14062    | <i>MIB1</i>     | No  | NA                                    | G | A | Imputed | 0.99528 | 0.009<br>(0.004) | 5E-02  |
| Height | rs1420023  | <i>CDKN1B</i>   | Yes | SNP not available                     | C | G | NA      | NA      | NA               | NA     |
| Height | rs143384   | <i>GDF5</i>     | No  | NA                                    | G | A | Imputed | 1       | 0.092<br>(0.004) | 1E-109 |
| Height | rs1461503  | <i>BSX</i>      | No  | NA                                    | C | A | Imputed | 0.99729 | 0.021<br>(0.004) | 4E-07  |
| Height | rs1546391  | <i>ZBTB20</i>   | No  | NA                                    | G | C | Imputed | 0.98751 | 0.031<br>(0.008) | 1E-04  |
| Height | rs1550162  | <i>EIF3H</i>    | No  | NA                                    | G | A | Imputed | 0.97822 | 0.022<br>(0.005) | 3E-06  |
| Height | rs1552173  | <i>PSCD1</i>    | No  | NA                                    | C | T | Imputed | 0.98704 | 0.013<br>(0.004) | 1E-03  |
| Height | rs1562975  | <i>RPL34</i>    | No  | NA                                    | A | G | Imputed | 0.99896 | 0.027<br>(0.004) | 2E-09  |
| Height | rs1576900  | <i>ADAMTSL1</i> | No  | NA                                    | G | A | Imputed | 0.97217 | 0.011<br>(0.005) | 2E-02  |
| Height | rs1582931  | <i>CCDC100</i>  | No  | NA                                    | G | A | Imputed | 1       | 0.023<br>(0.004) | 2E-08  |
| Height | rs1599473  | <i>NOV</i>      | No  | NA                                    | G | T | Imputed | 0.98821 | 0.030<br>(0.005) | 7E-10  |
| Height | rs1614303  | <i>FGFR2</i>    | No  | NA                                    | T | G | Imputed | 0.99718 | 0.015<br>(0.005) | 6E-03  |
| Height | rs165189   | <i>PSD2</i>     | No  | NA                                    | G | A | Imputed | 0.9813  | 0.014<br>(0.006) | 2E-02  |
| Height | rs1658351  | <i>FLNB</i>     | No  | NA                                    | C | T | Imputed | 0.99121 | 0.024<br>(0.004) | 2E-08  |
| Height | rs1659127  | <i>MKL2</i>     | No  | NA                                    | A | G | Imputed | 1       | 0.022<br>(0.004) | 2E-07  |
| Height | rs1681630  | <i>PTPRJ</i>    | No  | NA                                    | T | C | Imputed | 0.99573 | 0.024<br>(0.004) | 2E-08  |
| Height | rs16834765 | <i>PTP4A2</i>   | No  | NA                                    | T | C | Imputed | 1       | 0.051            | 6E-09  |

|        |            |                   |    |    |   |   |         |         |                   |       |
|--------|------------|-------------------|----|----|---|---|---------|---------|-------------------|-------|
| Height | rs16895130 | <i>CCND3</i>      | No | NA | G | A | Imputed | 0.98958 | (0.009)<br>0.024  | 3E-07 |
| Height | rs16964211 | <i>CYP19A1</i>    | No | NA | G | A | Imputed | 1       | (0.005)<br>0.043  | 1E-05 |
| Height | rs16968242 | <i>SCAPER</i>     | No | NA | G | C | Imputed | 0.99962 | (0.010)<br>0.035  | 3E-05 |
| Height | rs17038954 | <i>PXDN</i>       | No | NA | T | C | Imputed | 0.95649 | (0.008)<br>0.029  | 7E-04 |
| Height | rs17081935 | <i>C4orf14</i>    | No | NA | T | C | Imputed | 0.9998  | (0.009)<br>0.035  | 2E-11 |
| Height | rs17113369 | <i>RWDD3</i>      | No | NA | T | C | Imputed | 1       | (0.005)<br>0.009  | 5E-01 |
| Height | rs17122659 | <i>SLC16A7</i>    | No | NA | G | A | Imputed | 0.99103 | (0.012)<br>0.023  | 5E-04 |
| Height | rs17250196 | <i>GATS/PVRIG</i> | No | NA | T | G | Imputed | 0.96925 | (0.007)<br>0.035  | 1E-04 |
| Height | rs17264185 | <i>SMAD6</i>      | No | NA | G | A | Imputed | 0.99628 | (0.009)<br>0.026  | 6E-08 |
| Height | rs17330192 | <i>FAM8A1</i>     | No | NA | C | T | Imputed | 0.98161 | (0.005)<br>-0.004 | 4E-01 |
| Height | rs17349981 | <i>MEX3B</i>      | No | NA | A | T | Imputed | 0.99669 | (0.005)<br>0.012  | 4E-02 |
| Height | rs17391694 | <i>GIPC2</i>      | No | NA | T | C | Imputed | 1       | (0.006)<br>0.036  | 5E-10 |
| Height | rs17410035 | <i>C5orf22</i>    | No | NA | T | G | Imputed | 0.99922 | (0.006)<br>-0.006 | 2E-01 |
| Height | rs17450430 | <i>STAU1</i>      | No | NA | T | A | Imputed | 0.9959  | (0.004)<br>0.044  | 2E-20 |
| Height | rs17511102 | <i>CDC42EP3</i>   | No | NA | T | A | Imputed | 1       | (0.005)<br>0.047  | 3E-11 |
| Height | rs17556750 | <i>PRKG2</i>      | No | NA | A | C | Imputed | 0.99479 | (0.007)<br>0.042  | 8E-21 |
| Height | rs17574650 | <i>GHR</i>        | No | NA | C | A | Imputed | 1       | (0.005)<br>0.043  | 3E-10 |
| Height | rs17783015 | <i>ATP2B1</i>     | No | NA | C | T | Imputed | 1       | (0.007)<br>0.009  | 1E-01 |
| Height | rs17792664 | <i>CHD8</i>       | No | NA | G | C | Imputed | 1       | (0.006)<br>0.025  | 8E-06 |

|        |            |                |    |    |   |   |         |         |                   |       |
|--------|------------|----------------|----|----|---|---|---------|---------|-------------------|-------|
| Height | rs17806888 | <i>SUCLG2</i>  | No | NA | T | C | Imputed | 1       | (0.006)<br>0.030  | 2E-06 |
| Height | rs17807185 | <i>RSBNIL</i>  | No | NA | G | A | Imputed | 0.9897  | (0.006)<br>0.011  | 1E-02 |
| Height | rs1797625  | <i>C3orf17</i> | No | NA | T | A | Imputed | 0.9765  | (0.004)<br>0.021  | 2E-06 |
| Height | rs1812175  | <i>HHIP</i>    | No | NA | G | A | Imputed | 1       | (0.004)<br>0.087  | 3E-57 |
| Height | rs181338   | <i>ZCCHC6</i>  | No | NA | T | C | Imputed | 0.99635 | (0.005)<br>0.035  | 9E-18 |
| Height | rs1832871  | <i>TULP4</i>   | No | NA | A | G | Imputed | 0.99881 | (0.004)<br>0.025  | 6E-09 |
| Height | rs1884897  | <i>BMP2</i>    | No | NA | A | G | Imputed | 0.9921  | (0.004)<br>0.055  | 4E-38 |
| Height | rs1923367  | <i>ZCCHC24</i> | No | NA | G | C | Imputed | 0.98201 | (0.004)<br>0.036  | 6E-18 |
| Height | rs1935157  | <i>HLX</i>     | No | NA | G | C | Imputed | 1       | (0.005)<br>0.018  | 9E-05 |
| Height | rs1950500  | <i>NFATC4</i>  | No | NA | T | C | Imputed | 1       | (0.004)<br>0.027  | 1E-09 |
| Height | rs1966913  | <i>LRRC36</i>  | No | NA | A | T | Imputed | 0.99972 | (0.010)<br>0.058  | 8E-09 |
| Height | rs1980850  | <i>RAD51L1</i> | No | NA | G | A | Imputed | 0.99858 | (0.006)<br>0.017  | 2E-03 |
| Height | rs1996422  | <i>FRYL</i>    | No | NA | G | A | Imputed | 0.98043 | (0.005)<br>-0.007 | 1E-01 |
| Height | rs2013265  | <i>ADAM28</i>  | No | NA | C | T | Imputed | 1       | (0.005)<br>0.028  | 2E-09 |
| Height | rs2023693  | <i>DCUNID3</i> | No | NA | G | A | Imputed | 0.99918 | (0.004)<br>0.008  | 5E-02 |
| Height | rs2034172  | <i>WNT5A</i>   | No | NA | G | A | Imputed | 0.99308 | (0.004)<br>0.011  | 1E-02 |
| Height | rs2057291  | <i>GNAS</i>    | No | NA | A | G | Imputed | 1       | (0.004)<br>0.019  | 9E-06 |
| Height | rs2058092  | <i>NUMB</i>    | No | NA | T | C | Imputed | 0.98608 | (0.004)<br>0.011  | 9E-03 |
| Height | rs2072268  | <i>ARSG</i>    | No | NA | G | A | Imputed | 1       | (0.004)<br>0.014  | 7E-04 |

|        |           |                 |    |    |   |   |         |         |                   |       |
|--------|-----------|-----------------|----|----|---|---|---------|---------|-------------------|-------|
| Height | rs2074977 | <i>NFIC</i>     | No | NA | C | A | Imputed | 1       | (0.004)<br>0.024  | 1E-08 |
| Height | rs2079795 | <i>C17orf82</i> | No | NA | T | C | Imputed | 1       | (0.004)<br>0.048  | 1E-28 |
| Height | rs2093210 | <i>C14orf39</i> | No | NA | C | T | Imputed | 0.97693 | (0.004)<br>0.038  | 1E-19 |
| Height | rs2117563 | <i>GRB2</i>     | No | NA | G | A | Imputed | 0.99931 | (0.004)<br>0.023  | 2E-05 |
| Height | rs2120335 | <i>PPP3R1</i>   | No | NA | G | A | Imputed | 0.99937 | (0.006)<br>0.018  | 1E-05 |
| Height | rs2123731 | <i>UHRF1</i>    | No | NA | A | G | Imputed | 1       | (0.004)<br>0.032  | 3E-12 |
| Height | rs212524  | <i>ECE1</i>     | No | NA | C | T | Imputed | 1       | (0.005)<br>0.022  | 1E-07 |
| Height | rs2145357 | <i>NT5DC1</i>   | No | NA | G | A | Imputed | 0.99659 | (0.004)<br>0.019  | 4E-05 |
| Height | rs2149163 | <i>BNC2</i>     | No | NA | C | G | Imputed | 0.99152 | (0.005)<br>0.017  | 5E-05 |
| Height | rs2164747 | <i>HSP90B1</i>  | No | NA | G | A | Imputed | 0.99925 | (0.004)<br>0.027  | 3E-05 |
| Height | rs2166898 | <i>GLI2</i>     | No | NA | G | A | Imputed | 1       | (0.007)<br>0.034  | 4E-10 |
| Height | rs217181  | <i>HPR</i>      | No | NA | T | C | Imputed | 1       | (0.005)<br>0.021  | 7E-05 |
| Height | rs2175513 | <i>FAM19A1</i>  | No | NA | G | A | Imputed | 0.98947 | (0.005)<br>0.000  | 1E+00 |
| Height | rs2211866 | <i>KCNJ15</i>   | No | NA | A | G | Imputed | 0.98188 | (0.004)<br>0.037  | 4E-18 |
| Height | rs2224538 | <i>MAFB</i>     | No | NA | T | C | Imputed | 0.98816 | (0.004)<br>0.020  | 4E-06 |
| Height | rs2237886 | <i>KCNQ1</i>    | No | NA | T | C | Imputed | 1       | (0.004)<br>0.063  | 4E-21 |
| Height | rs2272566 | <i>PSMD13</i>   | No | NA | A | G | Imputed | 0.99421 | (0.007)<br>-0.007 | 9E-02 |
| Height | rs2275325 | <i>ZC3H11A</i>  | No | NA | C | G | Imputed | 1       | (0.004)<br>0.019  | 4E-05 |
| Height | rs2280470 | <i>ACAN</i>     | No | NA | A | G | Imputed | 1       | (0.005)<br>0.044  | 3E-24 |



|        |           |                |    |    |   |   |         |         |                  |       |
|--------|-----------|----------------|----|----|---|---|---------|---------|------------------|-------|
| Height | rs2284746 | <i>MFAP2</i>   | No | NA | G | C | Imputed | 1       | (0.004)<br>0.036 | 2E-18 |
| Height | rs2289195 | <i>DNMT3A</i>  | No | NA | A | G | Imputed | 1       | (0.004)<br>0.044 | 6E-26 |
| Height | rs2298265 | <i>ZNF687</i>  | No | NA | C | T | Imputed | 1       | (0.004)<br>0.014 | 3E-02 |
| Height | rs2302580 | <i>CPZ</i>     | No | NA | C | T | Imputed | 0.98211 | (0.007)<br>0.025 | 1E-09 |
| Height | rs2306596 | <i>RFC1</i>    | No | NA | A | C | Imputed | 0.99585 | (0.004)<br>0.018 | 2E-05 |
| Height | rs2306694 | <i>CS</i>      | No | NA | G | A | Imputed | 0.99922 | (0.004)<br>0.042 | 4E-07 |
| Height | rs2326458 | <i>ZDHHC7</i>  | No | NA | C | A | Imputed | 1       | (0.008)<br>0.024 | 3E-07 |
| Height | rs2338115 | <i>PIP4K2B</i> | No | NA | T | C | Imputed | 0.99426 | (0.005)<br>0.027 | 6E-11 |
| Height | rs2345835 | <i>RDH14</i>   | No | NA | C | T | Imputed | 0.99246 | (0.004)<br>0.003 | 4E-01 |
| Height | rs2510396 | <i>GAL</i>     | No | NA | C | G | Imputed | 0.99288 | (0.004)<br>0.041 | 2E-13 |
| Height | rs2581830 | <i>RFT1</i>    | No | NA | T | C | Imputed | 0.99506 | (0.006)<br>0.032 | 1E-14 |
| Height | rs2597513 | <i>HDAC11</i>  | No | NA | C | T | Imputed | 1       | (0.004)<br>0.033 | 1E-06 |
| Height | rs26024   | <i>FBN2</i>    | No | NA | C | A | Imputed | 0.98519 | (0.007)<br>0.014 | 8E-04 |
| Height | rs2631676 | <i>PCGF5</i>   | No | NA | G | A | Imputed | 0.99202 | (0.004)<br>0.039 | 1E-13 |
| Height | rs2633761 | <i>ITPR1</i>   | No | NA | A | G | Imputed | 0.95603 | (0.005)<br>0.010 | 2E-02 |
| Height | rs2662027 | <i>MIER3</i>   | No | NA | G | T | Imputed | 1       | (0.004)<br>0.025 | 2E-04 |
| Height | rs2682587 | <i>XRCC1</i>   | No | NA | A | C | Imputed | 0.99138 | (0.007)<br>0.029 | 3E-08 |
| Height | rs26868   | <i>CASKIN1</i> | No | NA | A | T | Imputed | 0.99848 | (0.005)<br>0.028 | 8E-12 |
| Height | rs2715094 | <i>GRB10</i>   | No | NA | G | A | Imputed | 0.98915 | (0.004)<br>0.020 | 3E-05 |

|        |           |                 |    |    |   |   |         |         |                             |       |
|--------|-----------|-----------------|----|----|---|---|---------|---------|-----------------------------|-------|
| Height | rs273945  | <i>CREB3L2</i>  | No | NA | C | A | Imputed | 0.94152 | (0.005)<br>0.021<br>(0.004) | 1E-06 |
| Height | rs2748483 | <i>GRM1</i>     | No | NA | A | T | Imputed | 0.99855 | 0.016<br>(0.004)            | 9E-05 |
| Height | rs2763273 | <i>SMOC2</i>    | No | NA | C | T | Imputed | 0.99591 | 0.034<br>(0.005)            | 3E-12 |
| Height | rs2781373 | <i>MAX</i>      | No | NA | G | A | Imputed | 0.99932 | 0.028<br>(0.004)            | 3E-11 |
| Height | rs2806561 | <i>LUZP1</i>    | No | NA | A | G | Imputed | 1       | 0.019<br>(0.004)            | 4E-06 |
| Height | rs2811594 | <i>FAM69A</i>   | No | NA | G | A | Imputed | 1       | 0.014<br>(0.004)            | 8E-04 |
| Height | rs2815379 | <i>SLC35D1</i>  | No | NA | G | A | Imputed | 1       | 0.014<br>(0.005)            | 2E-03 |
| Height | rs2829941 | <i>APP</i>      | No | NA | T | G | Imputed | 0.99247 | 0.002<br>(0.004)            | 7E-01 |
| Height | rs2834442 | <i>KCNE2</i>    | No | NA | A | T | Imputed | 1       | 0.018<br>(0.004)            | 2E-05 |
| Height | rs2854207 | <i>CSH2</i>     | No | NA | G | C | Imputed | 0.99608 | 0.053<br>(0.005)            | 7E-31 |
| Height | rs2856321 | <i>ETV6</i>     | No | NA | G | A | Imputed | 1       | 0.029<br>(0.004)            | 1E-11 |
| Height | rs2871865 | <i>IGF1R</i>    | No | NA | C | G | Imputed | 1       | 0.063<br>(0.006)            | 4E-23 |
| Height | rs2888893 | <i>C12orf23</i> | No | NA | C | T | Imputed | 0.99863 | 0.013<br>(0.004)            | 1E-03 |
| Height | rs291979  | <i>GRK5</i>     | No | NA | A | G | Imputed | 0.9937  | 0.022<br>(0.005)            | 7E-06 |
| Height | rs2956605 | <i>CRISPLD1</i> | No | NA | A | C | Imputed | 0.97906 | 0.027<br>(0.004)            | 2E-10 |
| Height | rs2961830 | <i>ISL1</i>     | No | NA | A | T | Imputed | 0.99448 | 0.017<br>(0.004)            | 8E-05 |
| Height | rs2974438 | <i>SLIT3</i>    | No | NA | G | A | Imputed | 0.98375 | 0.037<br>(0.005)            | 2E-13 |
| Height | rs3014219 | <i>AKR1A1</i>   | No | NA | G | A | Imputed | 1       | 0.013<br>(0.004)            | 1E-03 |
| Height | rs301901  | <i>NIPBL</i>    | No | NA | A | G | Imputed | 0.99547 | 0.028                       | 3E-11 |

|        |           |                   |     |                                       |   |   |         |         |                  |       |
|--------|-----------|-------------------|-----|---------------------------------------|---|---|---------|---------|------------------|-------|
| Height | rs310421  | <i>FAM46A</i>     | No  | NA                                    | T | G | Imputed | 0.99828 | (0.004)<br>0.031 | 3E-14 |
| Height | rs3116168 | <i>DIS3L2</i>     | No  | NA                                    | C | T | Imputed | 0.99802 | (0.004)<br>0.046 | 8E-24 |
| Height | rs3118905 | <i>DLEU7</i>      | No  | NA                                    | G | A | Imputed | 1       | (0.005)<br>0.056 | 6E-35 |
| Height | rs3132297 | <i>RXRA</i>       | No  | NA                                    | G | A | Imputed | 1       | (0.005)<br>0.005 | 4E-01 |
| Height | rs314263  | <i>LIN28B</i>     | No  | NA                                    | C | T | Imputed | 0.99833 | (0.006)<br>0.048 | 3E-28 |
| Height | rs316618  | <i>LTK</i>        | No  | NA                                    | T | A | Imputed | 0.95894 | (0.004)<br>0.015 | 4E-03 |
| Height | rs318095  | <i>ATP5G1</i>     | No  | NA                                    | T | C | Imputed | 0.99849 | (0.005)<br>0.034 | 1E-16 |
| Height | rs32855   | <i>FAM151B</i>    | No  | NA                                    | A | G | Imputed | 0.9916  | (0.004)<br>0.019 | 1E-04 |
| Height | rs34651   | <i>TNPO1</i>      | No  | NA                                    | C | T | Imputed | 0.96907 | (0.005)<br>0.042 | 4E-08 |
| Height | rs354196  | <i>SPTBN1</i>     | No  | NA                                    | G | A | Imputed | 0.97687 | (0.008)<br>0.006 | 2E-01 |
| Height | rs3739707 | <i>LPAR1</i>      | No  | NA                                    | C | A | Imputed | 0.9919  | (0.004)<br>0.029 | 2E-09 |
| Height | rs3760318 | <i>CENTA2</i>     | No  | NA                                    | G | A | Imputed | 1       | (0.005)<br>0.051 | 9E-34 |
| Height | rs3763631 | <i>NPR2/SPAG8</i> | No  | NA                                    | C | G | Imputed | 0.99079 | (0.004)<br>0.017 | 1E-04 |
| Height | rs3782089 | <i>SSSCA1</i>     | No  | NA                                    | C | T | Imputed | 1       | (0.004)<br>0.027 | 8E-04 |
| Height | rs3790086 | <i>WWP2</i>       | Yes | SNP not in Hardy-Weinberg equilibrium | C | G | NA      | NA      | (0.008)<br>NA    | NA    |
| Height | rs3791679 | <i>EFEMP1</i>     | No  | NA                                    | A | G | Imputed | 1       | (0.008)<br>0.080 | 9E-60 |
| Height | rs3802758 | <i>PEX16</i>      | No  | NA                                    | A | G | Imputed | 0.9886  | (0.005)<br>0.009 | 2E-01 |
| Height | rs3807931 | <i>ITGB8</i>      | No  | NA                                    | A | G | Imputed | 0.99273 | (0.008)<br>0.031 | 3E-14 |
| Height | rs3809790 | <i>SSH2</i>       | No  | NA                                    | C | T | Imputed | 0.99929 | (0.004)<br>0.016 | 8E-05 |

|        |           |                 |    |    |   |   |         |         |                  |       |
|--------|-----------|-----------------|----|----|---|---|---------|---------|------------------|-------|
| Height | rs3812040 | <i>DAB2</i>     | No | NA | T | C | Imputed | 0.99127 | (0.004)<br>0.018 | 1E-04 |
| Height | rs3812423 | <i>KCTD9</i>    | No | NA | G | C | Imputed | 0.99973 | (0.005)<br>0.013 | 2E-03 |
| Height | rs3814333 | <i>GLT25D2</i>  | No | NA | T | C | Imputed | 1       | (0.004)<br>0.049 | 2E-28 |
| Height | rs3818416 | <i>EDNRB</i>    | No | NA | C | A | Imputed | 0.99548 | (0.004)<br>0.019 | 7E-05 |
| Height | rs3825199 | <i>SOCS2</i>    | No | NA | G | A | Imputed | 1       | (0.005)<br>0.059 | 2E-32 |
| Height | rs3885668 | <i>KLF11</i>    | No | NA | C | T | Imputed | 0.99257 | (0.005)<br>0.023 | 4E-08 |
| Height | rs3915129 | <i>CTNNB1</i>   | No | NA | G | T | Imputed | 0.99872 | (0.004)<br>0.024 | 3E-09 |
| Height | rs3923086 | <i>AXIN2</i>    | No | NA | C | A | Imputed | 0.9707  | (0.004)<br>0.029 | 6E-12 |
| Height | rs3958122 | <i>SLBP</i>     | No | NA | T | C | Imputed | 0.99446 | (0.004)<br>0.025 | 4E-09 |
| Height | rs39623   | <i>ADAMTS19</i> | No | NA | A | T | Imputed | 0.99499 | (0.004)<br>0.049 | 2E-10 |
| Height | rs4072910 | <i>ADAMTS10</i> | No | NA | G | C | Imputed | 1       | (0.008)<br>0.033 | 4E-16 |
| Height | rs42039   | <i>CDK6</i>     | No | NA | T | C | Imputed | 0.99565 | (0.004)<br>0.058 | 4E-34 |
| Height | rs422421  | <i>FGFR4</i>    | No | NA | C | T | Imputed | 1       | (0.005)<br>0.044 | 1E-18 |
| Height | rs4239020 | <i>CCDC57</i>   | No | NA | C | T | Imputed | 1       | (0.005)<br>0.017 | 1E-04 |
| Height | rs425277  | <i>PRKCZ</i>    | No | NA | T | C | Imputed | 1       | (0.004)<br>0.018 | 8E-05 |
| Height | rs429433  | <i>MFHAS1</i>   | No | NA | A | G | Imputed | 1       | (0.005)<br>0.045 | 2E-06 |
| Height | rs4332428 | <i>AKR1C1</i>   | No | NA | A | G | Imputed | 0.9991  | (0.010)<br>0.047 | 2E-13 |
| Height | rs4350272 | <i>ARHGAP21</i> | No | NA | A | G | Imputed | 0.99009 | (0.006)<br>0.012 | 9E-03 |
| Height | rs4369779 | <i>CABLES1</i>  | No | NA | C | T | Imputed | 1       | (0.005)<br>0.075 | 2E-50 |

|        |           |                            |    |    |   |   |         |         |                             |       |
|--------|-----------|----------------------------|----|----|---|---|---------|---------|-----------------------------|-------|
| Height | rs4425077 | <i>FNI</i>                 | No | NA | G | C | Imputed | 0.99732 | (0.005)<br>0.008<br>(0.004) | 5E-02 |
| Height | rs4548838 | <i>ADAMTS17</i>            | No | NA | T | C | Imputed | 0.99398 | 0.035<br>(0.004)            | 3E-17 |
| Height | rs4601530 | <i>CLIC4</i>               | No | NA | C | T | Imputed | 1       | 0.001<br>(0.005)            | 8E-01 |
| Height | rs4605213 | <i>NME1-<br/>NME2/NME2</i> | No | NA | C | G | Imputed | 1       | 0.017<br>(0.004)            | 8E-05 |
| Height | rs4624820 | <i>SPRY4</i>               | No | NA | A | G | Imputed | 1       | 0.005<br>(0.004)            | 2E-01 |
| Height | rs4640244 | <i>KCNJ12</i>              | No | NA | A | G | Imputed | 1       | 0.028<br>(0.004)            | 2E-11 |
| Height | rs4656220 | <i>PRRX1</i>               | No | NA | T | C | Imputed | 1       | 0.017<br>(0.004)            | 1E-04 |
| Height | rs4686904 | <i>BCL6</i>                | No | NA | C | T | Imputed | 0.99701 | 0.025<br>(0.004)            | 5E-09 |
| Height | rs4725061 | <i>GLCC11</i>              | No | NA | G | A | Imputed | 0.99019 | 0.021<br>(0.004)            | 3E-07 |
| Height | rs4733724 | <i>MLZE</i>                | No | NA | A | G | Imputed | 0.99728 | 0.057<br>(0.005)            | 6E-29 |
| Height | rs4735677 | <i>PXMP3</i>               | No | NA | T | A | Imputed | 0.99776 | 0.045<br>(0.005)            | 4E-23 |
| Height | rs4785393 | <i>PAPD5</i>               | No | NA | G | A | Imputed | 0.98617 | 0.011<br>(0.005)            | 5E-02 |
| Height | rs4802134 | <i>SIPA1L3</i>             | No | NA | A | G | Imputed | 0.99656 | 0.006<br>(0.005)            | 2E-01 |
| Height | rs4803468 | <i>BCKDHA</i>              | No | NA | A | G | Imputed | 0.99945 | 0.031<br>(0.004)            | 7E-14 |
| Height | rs4812586 | <i>SAMHD1</i>              | No | NA | A | G | Imputed | 0.99743 | 0.035<br>(0.006)            | 2E-09 |
| Height | rs4843367 | <i>RAB28</i>               | No | NA | G | A | Imputed | 0.99706 | 0.007<br>(0.004)            | 1E-01 |
| Height | rs4868126 | <i>FBXW11</i>              | No | NA | G | T | Imputed | 0.93315 | 0.035<br>(0.004)            | 7E-16 |
| Height | rs4875421 | <i>CSMD1</i>               | No | NA | T | A | Imputed | 0.99645 | 0.010<br>(0.004)            | 1E-02 |
| Height | rs4883972 | <i>KLF12</i>               | No | NA | C | G | Imputed | 0.99117 | -0.005                      | 2E-01 |

|        |           |                   |     |                   |    |   |         |         |                  |                  |
|--------|-----------|-------------------|-----|-------------------|----|---|---------|---------|------------------|------------------|
| Height | rs4896582 | <i>GPR126</i>     | No  | NA                | G  | A | Imputed | 1       | (0.004)<br>0.058 | 6E-38            |
| Height | rs4953951 | <i>ZRANB3</i>     | No  | NA                | C  | T | Imputed | 0.99645 | (0.004)<br>0.039 | 1E-31            |
| Height | rs497273  | <i>SPPL3</i>      | No  | NA                | C  | G | Imputed | 0.99824 | (0.003)<br>0.019 | 7E-06            |
| Height | rs4974480 | <i>ANAPC13</i>    | No  | NA                | T  | A | Imputed | 0.98669 | (0.004)<br>0.024 | 8E-08            |
| Height | rs4986172 | <i>ACBD4</i>      | No  | NA                | C  | T | Imputed | 1       | (0.004)<br>0.030 | 7E-12            |
| Height | rs526896  | <i>PITX1</i>      | No  | NA                | T  | G | Imputed | 1       | (0.004)<br>0.030 | 6E-11            |
| Height | rs540652  | <i>NOSTRIN</i>    | No  | NA                | T  | C | Imputed | 1       | (0.005)<br>0.024 | 3E-09            |
| Height | rs552707  | <i>JAZF1</i>      | No  | NA                | T  | C | Imputed | 0.99867 | (0.004)<br>0.051 | 2E-29            |
| Height | rs564914  | <i>FOXD2</i>      | No  | NA                | T  | A | Imputed | 1       | (0.004)<br>0.016 | 1E-04            |
| Height | rs567401  | <i>DDAH1</i>      | Yes | Imputation r2<0.9 | T  | C | NA      | NA      | NA               | NA               |
| Height | rs568610  | <i>SCARA3</i>     | No  |                   | NA | T | C       | Imputed | 0.98877          | (0.005)<br>0.023 |
| Height | rs5742915 | <i>PML</i>        | No  | NA                | C  | T | Imputed | 1       | (0.004)<br>0.037 | 8E-20            |
| Height | rs584828  | <i>IGFBP4</i>     | No  | NA                | C  | T | Imputed | 0.99238 | (0.004)<br>0.028 | 1E-11            |
| Height | rs6061231 | <i>RPS21</i>      | No  | NA                | C  | A | Imputed | 0.98656 | (0.005)<br>0.017 | 2E-04            |
| Height | rs606452  | <i>SERPINH1</i>   | No  | NA                | A  | C | Imputed | 1       | (0.006)<br>0.055 | 1E-20            |
| Height | rs6080830 | <i>BANF2</i>      | No  | NA                | A  | G | Imputed | 0.99462 | (0.004)<br>0.016 | 8E-05            |
| Height | rs632124  | <i>DDX6</i>       | No  | NA                | A  | T | Imputed | 0.99825 | (0.004)<br>0.017 | 4E-05            |
| Height | rs6420435 | <i>MPHOSPH6</i>   | No  | NA                | A  | C | Imputed | 0.97978 | (0.005)<br>0.022 | 5E-06            |
| Height | rs6435143 | <i>NOP5/NOP58</i> | No  | NA                | A  | C | Imputed | 0.98904 | (0.004)<br>0.003 | 4E-01            |

|        |           |                 |    |    |   |   |         |         |                  |       |
|--------|-----------|-----------------|----|----|---|---|---------|---------|------------------|-------|
| Height | rs6439168 | <i>H1FX</i>     | No | NA | G | A | Imputed | 0.9904  | 0.045<br>(0.005) | 1E-19 |
| Height | rs6441170 | <i>SHOX2</i>    | No | NA | C | T | Imputed | 0.99934 | 0.024<br>(0.004) | 1E-08 |
| Height | rs6446315 | <i>CYTL1</i>    | No | NA | G | A | Imputed | 0.98569 | 0.013<br>(0.006) | 2E-02 |
| Height | rs6457374 | <i>HLA-C</i>    | No | NA | C | T | Imputed | 1       | 0.046<br>(0.004) | 8E-25 |
| Height | rs6462432 | <i>KBTBD2</i>   | No | NA | A | G | Imputed | 1       | 0.010<br>(0.004) | 2E-02 |
| Height | rs6485978 | <i>TEAD1</i>    | No | NA | C | T | Imputed | 0.99307 | 0.023<br>(0.004) | 4E-08 |
| Height | rs6540834 | <i>PTPN14</i>   | No | NA | C | T | Imputed | 1       | 0.018<br>(0.004) | 2E-05 |
| Height | rs6561319 | <i>LRCH1</i>    | No | NA | A | C | Imputed | 0.99061 | 0.025<br>(0.004) | 5E-09 |
| Height | rs6584575 | <i>SH3PXD2A</i> | No | NA | A | G | Imputed | 0.98594 | 0.026<br>(0.007) | 2E-04 |
| Height | rs6600365 | <i>SCMH1</i>    | No | NA | C | T | Imputed | 1       | 0.028<br>(0.004) | 5E-12 |
| Height | rs6658763 | <i>FMO5</i>     | No | NA | C | T | Imputed | 1       | 0.012<br>(0.008) | 1E-01 |
| Height | rs6688100 | <i>VANGL2</i>   | No | NA | T | C | Imputed | 1       | 0.006<br>(0.004) | 1E-01 |
| Height | rs6691924 | <i>ACOT11</i>   | No | NA | T | C | Imputed | 1       | 0.019<br>(0.006) | 3E-03 |
| Height | rs6694089 | <i>DNM3</i>     | No | NA | A | G | Imputed | 1       | 0.035<br>(0.005) | 2E-14 |
| Height | rs6696239 | <i>ZNF678</i>   | No | NA | G | A | Imputed | 1       | 0.043<br>(0.005) | 1E-16 |
| Height | rs6714546 | <i>LTBP1</i>    | No | NA | G | A | Imputed | 1       | 0.036<br>(0.005) | 6E-16 |
| Height | rs6746356 | <i>SP3</i>      | No | NA | A | C | Imputed | 0.99407 | 0.020<br>(0.005) | 2E-05 |
| Height | rs6761041 | <i>SERPINE2</i> | No | NA | T | C | Imputed | 0.98915 | 0.024<br>(0.004) | 1E-08 |
| Height | rs6794009 | <i>PTPRG</i>    | No | NA | G | A | Imputed | 0.9852  | 0.030<br>(0.004) | 5E-13 |

|        |           |                 |    |    |   |   |         |         |                  |       |
|--------|-----------|-----------------|----|----|---|---|---------|---------|------------------|-------|
| Height | rs6813055 | <i>DMP1</i>     | No | NA | A | T | Imputed | 0.99764 | 0.020<br>(0.004) | 7E-07 |
| Height | rs6838153 | <i>EXOSC9</i>   | No | NA | G | A | Imputed | 0.98791 | 0.017<br>(0.004) | 2E-04 |
| Height | rs6879260 | <i>GFPT2</i>    | No | NA | C | T | Imputed | 1       | 0.024<br>(0.004) | 6E-09 |
| Height | rs6894139 | <i>MEF2C</i>    | No | NA | T | G | Imputed | 0.99738 | 0.031<br>(0.004) | 4E-14 |
| Height | rs6902771 | <i>ESR1</i>     | No | NA | T | C | Imputed | 1       | 0.033<br>(0.004) | 8E-16 |
| Height | rs6920372 | <i>PPIL6</i>    | No | NA | G | A | Imputed | 0.99527 | 0.024<br>(0.004) | 6E-09 |
| Height | rs692964  | <i>CEP192</i>   | No | NA | G | A | Imputed | 0.99944 | 0.015<br>(0.004) | 4E-04 |
| Height | rs6949739 | <i>IGFBP3</i>   | No | NA | T | A | Imputed | 0.99158 | 0.037<br>(0.007) | 1E-06 |
| Height | rs6952113 | <i>C7orf58</i>  | No | NA | G | A | Imputed | 0.99963 | 0.019<br>(0.004) | 5E-06 |
| Height | rs6955948 | <i>TMEM176A</i> | No | NA | T | C | Imputed | 0.99692 | 0.018<br>(0.005) | 7E-05 |
| Height | rs6962887 | <i>CNOT4</i>    | No | NA | T | G | Imputed | 0.97958 | 0.025<br>(0.004) | 3E-08 |
| Height | rs6971575 | <i>SLC25A13</i> | No | NA | C | G | Imputed | 0.97974 | 0.009<br>(0.004) | 4E-02 |
| Height | rs6974574 | <i>STARD3NL</i> | No | NA | T | A | Imputed | 0.99796 | 0.026<br>(0.004) | 8E-10 |
| Height | rs6988484 | <i>EFCAB1</i>   | No | NA | C | T | Imputed | 0.99665 | 0.023<br>(0.005) | 1E-06 |
| Height | rs7027110 | <i>ZNF462</i>   | No | NA | A | G | Imputed | 1       | 0.032<br>(0.005) | 8E-11 |
| Height | rs7033487 | <i>PAPPA</i>    | No | NA | T | C | Imputed | 0.99616 | 0.038<br>(0.005) | 2E-13 |
| Height | rs7033940 | <i>UHRF2</i>    | No | NA | G | C | Imputed | 0.99    | 0.011<br>(0.007) | 8E-02 |
| Height | rs7043114 | <i>IPPK</i>     | No | NA | C | T | Imputed | 0.99813 | 0.014<br>(0.004) | 5E-04 |
| Height | rs7069985 | <i>RAB18</i>    | No | NA | G | A | Imputed | 0.99489 | 0.016<br>(0.005) | 1E-03 |



|        |           |                  |     |                   |   |   |         |         |                  |       |
|--------|-----------|------------------|-----|-------------------|---|---|---------|---------|------------------|-------|
| Height | rs7112925 | <i>RHOD</i>      | No  | NA                | C | T | Imputed | 1       | 0.034<br>(0.004) | 2E-15 |
| Height | rs7154721 | <i>TRIP11</i>    | No  | NA                | T | C | Imputed | 0.99827 | 0.026<br>(0.004) | 5E-10 |
| Height | rs7162542 | <i>ADAMTSL3</i>  | No  | NA                | G | C | Imputed | 0.9977  | 0.048<br>(0.004) | 6E-31 |
| Height | rs7162825 | <i>LACTB</i>     | No  | NA                | T | C | Imputed | 0.99789 | 0.007<br>(0.004) | 8E-02 |
| Height | rs7177711 | <i>FAM148A</i>   | No  | NA                | A | G | Imputed | 0.99794 | 0.022<br>(0.004) | 1E-07 |
| Height | rs7181724 | <i>MCTP2</i>     | No  | NA                | G | A | Imputed | 0.96555 | 0.022<br>(0.004) | 3E-07 |
| Height | rs720390  | <i>IGF2BP2</i>   | No  | NA                | A | G | Imputed | 1       | 0.034<br>(0.004) | 8E-16 |
| Height | rs724016  | <i>ZBTB38</i>    | No  | NA                | G | A | Imputed | 1       | 0.085<br>(0.004) | 2E-94 |
| Height | rs7253628 | <i>ZNF536</i>    | No  | NA                | G | A | Imputed | 0.99548 | 0.029<br>(0.005) | 1E-07 |
| Height | rs7259684 | <i>LOC729747</i> | No  | NA                | G | A | Imputed | 0.99894 | 0.047<br>(0.008) | 5E-10 |
| Height | rs7261425 | <i>C20orf26</i>  | No  | NA                | C | G | Imputed | 1       | 0.015<br>(0.005) | 1E-03 |
| Height | rs7273787 | <i>SMOX</i>      | No  | NA                | G | A | Imputed | 0.99541 | 0.031<br>(0.004) | 4E-13 |
| Height | rs7284476 | <i>TRIOBP</i>    | No  | NA                | A | G | Imputed | 0.99699 | 0.017<br>(0.004) | 4E-05 |
| Height | rs7319045 | <i>GPC5</i>      | No  | NA                | A | G | Imputed | 1       | 0.030<br>(0.004) | 1E-12 |
| Height | rs738288  | <i>SMCR7L</i>    | No  | NA                | G | A | Imputed | 0.98417 | 0.010<br>(0.004) | 2E-02 |
| Height | rs7466269 | <i>FUBP3</i>     | No  | NA                | A | G | Imputed | 1       | 0.035<br>(0.004) | 2E-16 |
| Height | rs749234  | <i>ZEB2</i>      | No  | NA                | A | G | Imputed | 0.99884 | 0.013<br>(0.004) | 4E-03 |
| Height | rs7517682 | <i>COL11A1</i>   | No  | NA                | G | A | Imputed | 1       | 0.032<br>(0.004) | 9E-15 |
| Height | rs7534365 | <i>SV2A</i>      | Yes | Imputation r2<0.9 | C | T | NA      | NA      | NA               | NA    |
| Height | rs7544462 | <i>C1orf149</i>  | No  | NA                | A | C | Imputed | 1       | 0.035            | 2E-06 |

|        |           |                |     |                                           |   |   |         |         |                             |       |
|--------|-----------|----------------|-----|-------------------------------------------|---|---|---------|---------|-----------------------------|-------|
| Height | rs7551732 | <i>PKN2</i>    | No  | NA                                        | A | T | Imputed | 1       | (0.007)<br>0.029<br>(0.004) | 2E-12 |
| Height | rs7567288 | <i>NAP5</i>    | No  | NA                                        | C | T | Imputed | 1       | 0.017<br>(0.005)            | 9E-04 |
| Height | rs7567851 | <i>PDE11A</i>  | No  | NA                                        | C | G | Imputed | 1       | 0.027<br>(0.008)            | 4E-04 |
| Height | rs7568069 | <i>ZNF638</i>  | No  | NA                                        | G | A | Imputed | 0.99949 | 0.031<br>(0.004)            | 2E-13 |
| Height | rs757081  | <i>NUCB2</i>   | No  | NA                                        | G | C | Imputed | 1       | 0.019<br>(0.004)            | 1E-05 |
| Height | rs761391  | <i>TBX18</i>   | No  | NA                                        | C | T | Imputed | 0.99562 | 0.015<br>(0.004)            | 3E-04 |
| Height | rs763318  | <i>RAB28</i>   | No  | NA                                        | G | A | Imputed | 0.98628 | 0.031<br>(0.004)            | 2E-14 |
| Height | rs7652177 | <i>FNDC3B</i>  | No  | NA                                        | G | C | Imputed | 1       | 0.031<br>(0.004)            | 2E-14 |
| Height | rs7659107 | <i>CAMK2D</i>  | No  | NA                                        | G | A | Imputed | 0.99028 | 0.004<br>(0.005)            | 4E-01 |
| Height | rs7692995 | <i>LCORL</i>   | Yes | SNP not in Hardy-<br>Weinberg equilibrium | T | C | NA      | NA      | NA                          | NA    |
| Height | rs7701414 | <i>PDLIM4</i>  | No  | NA                                        | G | A | Imputed | 0.99613 | 0.043<br>(0.004)            | 9E-26 |
| Height | rs7716219 | <i>SLC38A9</i> | No  | NA                                        | T | C | Imputed | 0.9953  | 0.035<br>(0.004)            | 6E-15 |
| Height | rs7727731 | <i>ADAMTS6</i> | No  | NA                                        | T | C | Imputed | 0.99557 | 0.020<br>(0.006)            | 1E-03 |
| Height | rs7733195 | <i>FAM44B</i>  | No  | NA                                        | G | A | Imputed | 0.99698 | 0.022<br>(0.004)            | 4E-07 |
| Height | rs7740107 | <i>L3MBTL3</i> | No  | NA                                        | T | A | Imputed | 0.99629 | 0.062<br>(0.005)            | 2E-40 |
| Height | rs780094  | <i>GCKR</i>    | No  | NA                                        | C | T | Imputed | 1       | 0.022<br>(0.004)            | 2E-07 |
| Height | rs7834383 | <i>DLC1</i>    | No  | NA                                        | T | G | Imputed | 0.98385 | 0.011<br>(0.004)            | 1E-02 |
| Height | rs7849585 | <i>QSOX2</i>   | No  | NA                                        | T | G | Imputed | 0.99758 | 0.031<br>(0.004)            | 2E-12 |
| Height | rs7853235 | <i>RMII</i>    | No  | NA                                        | T | C | Imputed | 0.98874 | 0.030                       | 7E-09 |

|        |           |                  |    |    |   |   |         |         |                             |       |
|--------|-----------|------------------|----|----|---|---|---------|---------|-----------------------------|-------|
| Height | rs7899004 | <i>SUFU</i>      | No | NA | T | C | Imputed | 0.99647 | (0.005)<br>0.035<br>(0.004) | 1E-17 |
| Height | rs7971536 | <i>CCDC53</i>    | No | NA | T | A | Imputed | 0.99239 | 0.028<br>(0.004)            | 5E-12 |
| Height | rs7980687 | <i>SBNO1</i>     | No | NA | A | G | Imputed | 1       | 0.043<br>(0.005)            | 1E-17 |
| Height | rs798497  | <i>GNA12</i>     | No | NA | A | G | Imputed | 1       | 0.062<br>(0.004)            | 1E-43 |
| Height | rs7985356 | <i>CDC16</i>     | No | NA | T | A | Imputed | 0.99639 | 0.026<br>(0.005)            | 1E-07 |
| Height | rs8006657 | <i>SAMD4A</i>    | No | NA | G | A | Imputed | 0.97777 | 0.014<br>(0.004)            | 1E-03 |
| Height | rs8017130 | <i>HOMEZ</i>     | No | NA | G | A | Imputed | 0.96175 | 0.017<br>(0.004)            | 1E-04 |
| Height | rs8052560 | <i>C16orf84</i>  | No | NA | A | C | Imputed | 1       | 0.031<br>(0.005)            | 2E-10 |
| Height | rs8058684 | <i>RBL2</i>      | No | NA | A | G | Imputed | 0.99637 | 0.031<br>(0.004)            | 3E-12 |
| Height | rs806794  | <i>HIST1H2BF</i> | No | NA | A | G | Imputed | 1       | 0.063<br>(0.005)            | 4E-43 |
| Height | rs8097893 | <i>GALR1</i>     | No | NA | A | G | Imputed | 0.99143 | 0.037<br>(0.010)            | 3E-04 |
| Height | rs8102380 | <i>ILF3</i>      | No | NA | G | A | Imputed | 0.99499 | 0.024<br>(0.004)            | 3E-08 |
| Height | rs8103068 | <i>BST2</i>      | No | NA | T | C | Imputed | 0.99332 | 0.024<br>(0.006)            | 1E-04 |
| Height | rs8103992 | <i>PBX4</i>      | No | NA | A | C | Imputed | 0.98893 | 0.032<br>(0.005)            | 9E-10 |
| Height | rs817300  | <i>PTCH1</i>     | No | NA | G | A | Imputed | 1       | 0.082<br>(0.008)            | 2E-26 |
| Height | rs8180991 | <i>TRIB1</i>     | No | NA | C | G | Imputed | 0.99501 | 0.026<br>(0.005)            | 3E-08 |
| Height | rs820848  | <i>HEXB</i>      | No | NA | G | A | Imputed | 0.98738 | 0.012<br>(0.005)            | 1E-02 |
| Height | rs822531  | <i>EZH2</i>      | No | NA | T | C | Imputed | 0.97338 | 0.053<br>(0.005)            | 6E-25 |
| Height | rs833152  | <i>PDE1A</i>     | No | NA | C | A | Imputed | 0.98533 | 0.020                       | 2E-06 |

|        |           |                 |     |                                           |   |   |         |         |                  |       |
|--------|-----------|-----------------|-----|-------------------------------------------|---|---|---------|---------|------------------|-------|
| Height | rs862034  | <i>LTBP2</i>    | No  | NA                                        | G | A | Imputed | 1       | (0.004)<br>0.027 | 3E-10 |
| Height | rs870183  | <i>VPS53</i>    | No  | NA                                        | G | A | Imputed | 0.99432 | (0.004)<br>0.001 | 8E-01 |
| Height | rs8756    | <i>HMGA2</i>    | No  | NA                                        | C | A | Imputed | 1       | (0.004)<br>0.056 | 4E-42 |
| Height | rs888403  | <i>SMCHD1</i>   | No  | NA                                        | G | A | Imputed | 0.99488 | (0.004)<br>0.011 | 8E-03 |
| Height | rs891088  | <i>INSR</i>     | No  | NA                                        | G | A | Imputed | 1       | (0.004)<br>0.027 | 9E-09 |
| Height | rs897080  | <i>C2orf34</i>  | No  | NA                                        | C | T | Imputed | 0.99077 | (0.005)<br>0.026 | 9E-08 |
| Height | rs915506  | <i>CCNJ</i>     | Yes | SNP not in Hardy-<br>Weinberg equilibrium | G | A | NA      | NA      | (0.005)<br>NA    | NA    |
| Height | rs9217    | <i>ZBTB4</i>    | No  | NA                                        | C | T | Imputed | 1       | (0.004)<br>0.043 | 2E-24 |
| Height | rs9291926 | <i>PIK3R1</i>   | No  | NA                                        | T | G | Imputed | 0.99821 | (0.004)<br>0.021 | 3E-07 |
| Height | rs9292468 | <i>C5orf23</i>  | No  | NA                                        | T | C | Imputed | 0.99566 | (0.004)<br>0.034 | 3E-16 |
| Height | rs929637  | <i>TMEM106B</i> | No  | NA                                        | G | T | Imputed | 0.99652 | (0.004)<br>0.014 | 3E-03 |
| Height | rs9309101 | <i>THADA</i>    | No  | NA                                        | G | A | Imputed | 0.98804 | (0.005)<br>0.014 | 8E-04 |
| Height | rs932445  | <i>GMDS</i>     | No  | NA                                        | T | C | Imputed | 0.99851 | (0.004)<br>0.016 | 9E-05 |
| Height | rs936339  | <i>PCOLCE2</i>  | No  | NA                                        | T | C | Imputed | 0.98118 | (0.004)<br>0.016 | 2E-03 |
| Height | rs9392918 | <i>BMP6</i>     | No  | NA                                        | C | T | Imputed | 0.99254 | (0.005)<br>0.050 | 4E-34 |
| Height | rs9395264 | <i>CD2AP</i>    | No  | NA                                        | G | T | Imputed | 0.99488 | (0.004)<br>0.026 | 5E-09 |
| Height | rs9404952 | <i>HLA-G</i>    | No  | NA                                        | A | G | Imputed | 0.99737 | (0.004)<br>0.003 | 5E-01 |
| Height | rs9428104 | <i>SPAG17</i>   | No  | NA                                        | G | A | Imputed | 1       | (0.004)<br>0.049 | 1E-25 |
| Height | rs9434723 | <i>H6PD</i>     | No  | NA                                        | A | G | Imputed | 1       | (0.005)<br>0.024 | 6E-05 |

|        |           |                |    |    |   |   |         |         |                  |       |
|--------|-----------|----------------|----|----|---|---|---------|---------|------------------|-------|
| Height | rs955748  | <i>WWC2</i>    | No | NA | G | A | Imputed | 1       | (0.006)<br>0.019 | 7E-05 |
| Height | rs9650315 | <i>CHCHD7</i>  | No | NA | G | T | Imputed | 1       | (0.005)<br>0.066 | 3E-27 |
| Height | rs975210  | <i>TLE3</i>    | No | NA | A | G | Imputed | 0.98941 | (0.006)<br>0.035 | 5E-11 |
| Height | rs9766    | <i>EZH1</i>    | No | NA | A | G | Imputed | 0.99396 | (0.005)<br>0.019 | 5E-06 |
| Height | rs9816693 | <i>VILL</i>    | No | NA | C | G | Imputed | 1       | (0.004)<br>0.023 | 1E-05 |
| Height | rs9825951 | <i>COL8A1</i>  | No | NA | T | A | Imputed | 0.98378 | (0.005)<br>0.019 | 6E-06 |
| Height | rs9835332 | <i>C3orf63</i> | No | NA | G | C | Imputed | 1       | (0.004)<br>0.024 | 5E-09 |
| Height | rs9841435 | <i>CCDC50</i>  | No | NA | G | A | Imputed | 0.99917 | (0.004)<br>0.011 | 1E-02 |
| Height | rs9858528 | <i>KLHL24</i>  | No | NA | A | G | Imputed | 0.99428 | (0.005)<br>0.000 | 9E-01 |
| Height | rs9880211 | <i>STAG1</i>   | No | NA | G | A | Imputed | 0.99892 | (0.005)<br>0.024 | 3E-07 |
| Height | rs989393  | <i>COL15A1</i> | No | NA | T | C | Imputed | 0.99371 | (0.005)<br>0.019 | 2E-05 |
| Height | rs991946  | <i>T</i>       | No | NA | C | T | Imputed | 0.99381 | (0.004)<br>0.022 | 4E-08 |
| Height | rs991967  | <i>TGFB2</i>   | No | NA | C | A | Imputed | 1       | (0.005)<br>0.049 | 4E-27 |
| Height | rs9967417 | <i>DYM</i>     | No | NA | G | C | Imputed | 1       | (0.004)<br>0.040 | 3E-22 |
| Height | rs9977276 | <i>COL6A1</i>  | No | NA | G | T | Imputed | 0.99096 | (0.005)<br>0.026 | 2E-07 |
| Height | rs9993613 | <i>ADAMTS3</i> | No | NA | T | G | Imputed | 0.99351 | (0.004)<br>0.040 | 7E-22 |

---

**Supplementary Table D:** Observational and genetic associations for A) height and B) body mass index (BMI) with job class and annual household income using ordinal regression models.

**A**

| Socio economic status measure | Subcategories | N      | Observational associations                                                |        | Genetic associations                                                          |        |
|-------------------------------|---------------|--------|---------------------------------------------------------------------------|--------|-------------------------------------------------------------------------------|--------|
|                               |               |        | Odds ratio (95% CI) for higher socioeconomic status SD increase in height | P      | Odds ratio (95% CI) for higher socioeconomic status per SD increase in height | P      |
| Job class                     | All           | 76404  | 1.22 (1.20 to 1.23)                                                       | <1E-15 | 1.08 (1.04 to 1.11)                                                           | 7E-5   |
|                               | Male only     | 37608  | 1.22 (1.20 to 1.24)                                                       | <1E-15 | 1.09 (1.04 to 1.15)                                                           | 0.0004 |
|                               | Female only   | 38796  | 1.21 (1.19 to 1.23)                                                       | <1E-15 | 1.04 (0.99 to 1.10)                                                           | 0.08   |
| Annual household income       | All           | 103327 | 1.26 (1.24 to 1.27)                                                       | <1E-15 | 1.09 (1.06 to 1.13)                                                           | 2E-8   |
|                               | Male only     | 50862  | 1.30 (1.28 to 1.32)                                                       | <1E-15 | 1.14 (1.10 to 1.19)                                                           | 5E-10  |
|                               | Female only   | 52465  | 1.21 (1.19 to 1.23)                                                       | <1E-15 | 1.04 (0.99 to 1.09)                                                           | 0.09   |

**B**

| Socio economic status measure | Subcategories | N      | Observational associations                                            |        | Genetic associations                                                  |       |
|-------------------------------|---------------|--------|-----------------------------------------------------------------------|--------|-----------------------------------------------------------------------|-------|
|                               |               |        | Odds ratio (95% CI) for higher socioeconomic status per SD higher BMI | P      | Odds ratio (95% CI) for higher socioeconomic status per SD higher BMI | P     |
| Job class                     | All           | 76404  | 0.94 (0.93 to 0.96)                                                   | <1E-15 | 0.89 (0.81 to 0.99)                                                   | 0.029 |
|                               | Male only     | 37608  | 0.99 (0.97 to 1.01)                                                   | 0.16   | 0.90 (0.77 to 1.06)                                                   | 0.22  |
|                               | Female only   | 38796  | 0.91 (0.90 to 0.93)                                                   | <1E-15 | 0.89 (0.78 to 1.01)                                                   | 0.07  |
| Annual household income       | All           | 103327 | 0.90 (0.89 to 0.91)                                                   | <1E-15 | 0.89 (0.81 to 0.97)                                                   | 0.01  |
|                               | Male only     | 50862  | 0.98 (0.96 to 0.99)                                                   | 0.005  | 1.08 (0.94 to 1.24)                                                   | 0.29  |

Female only    52465    0.86 (0.84 to 0.87)    <1E-15    0.76 (0.68 to 0.86)    5E-6

**Supplementary table E:** Genetic associations between BMI and income in women stratified on A) employment status and marital status or B) health status

| Employment Status | Marital status                   | N      | Beta (95%CI) representing a SD change in income per SD change in BMI | P    |
|-------------------|----------------------------------|--------|----------------------------------------------------------------------|------|
| Working           | All                              | 33,939 | -0.15 (-0.23 to -0.07)                                               | 4E-4 |
| Working           | Live with husband/partner        | 23,575 | -0.12 (-0.22 to -0.03)                                               | 0.01 |
| Working           | Do not live with husband/partner | 9,563  | -0.10 (-0.22 to 0.01)                                                | 0.08 |
| Non-working       | All                              | 28,914 | -0.11 (-0.21 to -0.01)                                               | 0.03 |
| Non-working       | Live with husband/partner        | 20,305 | -0.12 (-0.25 to 0.01)                                                | 0.07 |
| Non-working       | Do not live with husband/partner | 6,981  | 0.01 (-0.10 to 0.13)                                                 | 0.82 |

  

| Health status                            | N      | Beta (95%CI) representing a SD change in income per SD change in BMI | P     |
|------------------------------------------|--------|----------------------------------------------------------------------|-------|
| No non-cancer or cancer disease reported | 12,127 | -0.23 (-0.39, -0.08)                                                 | 0.004 |

Note marital status classified as living with husband or partner versus those not living with a husband/partner

**Supplementary table F:** Associations between taller stature and five measures of socio-economic comparing standard instrumental variable analysis and the Egger method

| Socio economic status measure     | Subcategories | N      | Genetic <sup>^</sup>                                          |       | Genetic – Egger <sup>^^</sup>                                 |        |
|-----------------------------------|---------------|--------|---------------------------------------------------------------|-------|---------------------------------------------------------------|--------|
|                                   |               |        | Change in socioeconomic status (95% CI) per SD taller stature | P     | Change in socioeconomic status (95% CI) per SD taller stature | P      |
| Age completed full time education | All           | 82543  | 0.03 (0.01 to 0.05)                                           | 0.01  | 0.07 (0.03 to 0.11)                                           | 0.0004 |
|                                   | Male only     | 38342  | 0.04 (0.01 to 0.07)                                           | 0.009 | 0.08 (0.02 to 0.14)                                           | 0.004  |
|                                   | Female only   | 44201  | 0.01 (-0.02 to 0.04)                                          | 0.40  | 0.05 (0.01 to 0.09)                                           | 0.018  |
| Degree education                  | All           | 118565 | 1.02 (0.99 to 1.05)                                           | 0.22  | 1.06 (0.99 to 1.13)                                           | 0.09   |
|                                   | Male only     | 56111  | 1.04 (1.00 to 1.09)                                           | 0.08  | 1.10 (1.01 to 1.19)                                           | 0.026  |
|                                   | Female only   | 62454  | 1.00 (0.95 to 1.05)                                           | 0.97  | 1.09 (1.00 to 1.19)                                           | 0.06   |
| Job class (skilled/unskilled)     | All           | 76404  | 1.12 (1.07 to 1.18)                                           | 6E-7  | 1.18 (1.08 to 1.29)                                           | 0.0002 |
|                                   | Male only     | 37608  | 1.13 (1.07 to 1.21)                                           | 2E-5  | 1.23 (1.10 to 1.37)                                           | 0.0004 |
|                                   | Female only   | 38796  | 1.14 (1.05 to 1.24)                                           | 0.003 | 1.21 (1.08 to 1.36)                                           | 0.002  |
| Annual household income           | All           | 103327 | 0.05 (0.03 to 0.07)                                           | 4E-8  | 0.05 (0.02 to 0.08)                                           | 0.0009 |
|                                   | Male only     | 50862  | 0.07 (0.05 to 0.10)                                           | 1E-9  | 0.08 (0.04 to 0.12)                                           | 0.0002 |
|                                   | Female only   | 52465  | 0.02 (0.00 to 0.05)                                           | 0.09  | 0.05 (0.00 to 0.10)                                           | 0.09   |
| Townsend deprivation index        | All           | 119519 | 0.00 (-0.02 to 0.01)                                          | 0.71  | -0.03 (-0.06 to 0.00)                                         | 0.038  |
|                                   | Male only     | 56582  | -0.02 (-0.05 to 0.00)                                         | 0.05  | -0.08 (-0.12 to -0.04)                                        | 0.0004 |
|                                   | Female only   | 62937  | 0.02 (-0.01 to 0.04)                                          | 0.19  | -0.005 (-0.05 to 0.04)                                        | 0.8    |

<sup>^</sup>Utilises instrumental variable analysis via the ivreg2 command in STATA for continuous variables and the 2-step procedure for binary outcomes using the height Genetic Risk Score. The F-stat when considering all individuals is  $\geq 10898$  for each socioeconomic status measure, in males only the F-stat is  $\geq 5308$  for each socioeconomic status measure and in females only the F-stat is  $\geq 5615$  for each socioeconomic status measure.

<sup>^^</sup>An alternative genetic approach detailed in Bowden et al., 2015

For age completed full time education, annual household income and Townsend deprivation index the changes reported are standard deviation. For degree and job class odds ratios are presented, representing odds of higher socioeconomic status per SD higher height.



**Supplementary table G:** Sensitivity analysis with the Egger Method to further investigate associations between higher BMI and two measures of socio-economic status

| Socio economic status measure     | Subcategories | N      | Genetic <sup>^^</sup>                                     |       | Genetic Egger <sup>^^^</sup>                              |        |
|-----------------------------------|---------------|--------|-----------------------------------------------------------|-------|-----------------------------------------------------------|--------|
|                                   |               |        | Change in socioeconomic status (95% CI) per SD higher BMI | P     | Change in socioeconomic status (95% CI) per SD higher BMI | P      |
| Age completed full time education | All           | 82543  | -0.01 (-0.07 to 0.04)                                     | 0.63  | 0.04 (-0.05 to 0.13)                                      | 0.44   |
|                                   | Male only     | 38342  | 0.00 (-0.09 to 0.09)                                      | 0.98  | 0.12 (-0.01 to 0.25)                                      | 0.08   |
|                                   | Female only   | 44201  | -0.02 (-0.09 to 0.05)                                     | 0.56  | -0.03 (-0.14 to 0.08)                                     | 0.38   |
| Degree education                  | All           | 118565 | 0.94 (0.85 to 1.03)                                       | 0.18  | 1.21 (1.01 to 1.45)                                       | 0.038  |
|                                   | Male only     | 56111  | 0.94 (0.81 to 1.09)                                       | 0.43  | 1.58 (1.23 to 2.02)                                       | 0.0006 |
|                                   | Female only   | 62454  | 0.93 (0.82 to 1.06)                                       | 0.28  | 0.97 (0.78 to 1.21)                                       | 0.82   |
| Job class (skilled/unskilled)     | All           | 76404  | 0.90 (0.79 to 1.02)                                       | 0.10  | 0.99 (0.78 to 1.26)                                       | 0.93   |
|                                   | Male only     | 37608  | 0.88 (0.73 to 1.08)                                       | 0.22  | 1.07 (0.80 to 1.44)                                       | 0.65   |
|                                   | Female only   | 38796  | 0.91 (0.76 to 1.08)                                       | 0.29  | 0.76 (0.56 to 1.02)                                       | 0.08   |
| Annual household income           | All           | 103327 | -0.05 (-0.10 to -0.00)                                    | 0.041 | -0.03 (-0.11 to 0.05)                                     | 0.58   |
|                                   | Male only     | 50862  | 0.06 (-0.02 to 0.14)                                      | 0.15  | 0.16 (0.04 to 0.29)                                       | 0.012  |
|                                   | Female only   | 52465  | -0.14 (-0.20 to -0.08)                                    | 1E-5  | -0.17 (-0.25 to -0.05)                                    | 0.004  |
| Townsend deprivation index        | All           | 119519 | 0.05 (0.01 to 0.10)                                       | 0.024 | -0.00 (-0.08 to 0.08)                                     | 0.96   |
|                                   | Male only     | 56582  | -0.01 (-0.08 to 0.06)                                     | 0.78  | -0.12 (-0.23, -0.01)                                      | 0.032  |
|                                   | Female only   | 62937  | 0.10 (0.04 to 0.16)                                       | 0.001 | 0.10 (-0.01 to 0.21)                                      | 0.08   |

<sup>^</sup>Utilises instrumental variable analysis, via the `ivreg2` command in STATA for continuous variables and the 2-step approach for binary outcomes, using the BMI Genetic Risk Score. The F-stat for all individuals is  $\geq 1257$  for each socioeconomic status measure, in males only the F-stat is  $\geq 591$  for each socioeconomic status measure and in females only the F-stat is  $\geq 666$  for each socioeconomic status measure.

<sup>^^</sup>An alternative genetic approach detailed in Bowden et al., 2015

For age completed full time education and Townsend deprivation index the changes reported are standard deviation.

**Supplementary table H:** Comparison of the A) height and B) BMI associations with the different socioeconomic status measures using the standard method and the linear mixed models that correct for close and distant relatedness, as implemented in BOLT LMM (2).

**A**

| Socioeconomic status measure      | Method used <sup>^</sup> | Beta (95% CI) for a change in socioeconomic status measure per SD change in height using standard method <sup>^^</sup> | P      | Beta (95% CI) for a change in socioeconomic status measure per SD change in height using BOLT LMM method <sup>^^^</sup> | P      |
|-----------------------------------|--------------------------|------------------------------------------------------------------------------------------------------------------------|--------|-------------------------------------------------------------------------------------------------------------------------|--------|
| Age completed full time education | Genetic                  | 0.03 (0.01 to 0.05)                                                                                                    | 0.0005 | 0.04 (0.02 to 0.06)                                                                                                     | 1E-05  |
| Age completed full time education | Genetic-Egger            | 0.07 (0.03 to 0.10)                                                                                                    | 0.0004 | 0.05 (0.02 to 0.09)                                                                                                     | 0.005  |
| Job class                         | Genetic                  | 0.04 (0.02 to 0.06)                                                                                                    | 2E-05  | 0.05 (0.03 to 0.07)                                                                                                     | 1.E-06 |
| Job class                         | Genetic-Egger            | 0.06 (0.02 to 0.09)                                                                                                    | 0.004  | 0.05 (0.01 to 0.09)                                                                                                     | 0.016  |
| Income                            | Genetic                  | 0.06 (0.04 to 0.07)                                                                                                    | 2E-12  | 0.05 (0.03 to 0.07)                                                                                                     | 2E-09  |
| Income                            | Genetic-Egger            | 0.05 (0.02 to 0.09)                                                                                                    | 0.0009 | 0.04 (0.01 to 0.08)                                                                                                     | 0.007  |
| Townsend Deprivation index        | Genetic                  | -0.01 (-0.02 to 0.01)                                                                                                  | 0.14   | -0.02 (-0.04 to 0.00)                                                                                                   | 0.015  |
| Townsend Deprivation index        | Genetic-Egger            | -0.03 (-0.06 to 0.00)                                                                                                  | 0.038  | -0.04 (-0.07 to -0.01)                                                                                                  | 0.018  |

**B**

| Socioeconomic status measure | Method used | Beta (95% CI) for a change in socioeconomic status measure per SD change in BMI using standard method <sup>^</sup> | P | Beta (95% CI) for a change in socioeconomic status measure per SD change in BMI using BOLT LMM method <sup>^^</sup> | P |
|------------------------------|-------------|--------------------------------------------------------------------------------------------------------------------|---|---------------------------------------------------------------------------------------------------------------------|---|
|------------------------------|-------------|--------------------------------------------------------------------------------------------------------------------|---|---------------------------------------------------------------------------------------------------------------------|---|

|                                   |               |                        |       |                        |       |
|-----------------------------------|---------------|------------------------|-------|------------------------|-------|
| Age completed full time education | Genetic-IV    | -0.02 (-0.07 to 0.03)  | 0.48  | -0.04 (-0.08 to 0.01)  | 0.14  |
| Job class                         | Genetic-IV    | -0.07 (-0.12 to -0.02) | 0.011 | -0.08 (-0.13 to -0.02) | 0.007 |
| Job class                         | Genetic-Egger | -0.04 (-0.15 to 0.07)  | 0.44  | -0.02 (-0.13 to 0.08)  | 0.66  |
| Income                            | Genetic       | -0.06 (-0.10 to -0.01) | 0.017 | -0.07 (-0.12 to -0.02) | 0.003 |
| Income                            | Genetic-Egger | -0.03 (-0.11 to 0.06)  | 0.58  | -0.01 (-0.09 to 0.07)  | 0.76  |
| Townsend Deprivation index        | Genetic       | 0.05 (0.01 to 0.10)    | 0.015 | 0.05 (0.01 to 0.09)    | 0.015 |
| Townsend Deprivation index        | Genetic-Egger | 0.00 (-0.08 to 0.08)   | 0.96  | -0.02 (-0.09 to 0.05)  | 0.63  |

<sup>^</sup> Genetic represents the standard instrumental variables approach and the results from the Egger method were presented as a sensitivity analysis when the standard instrumental variable method was  $P < 0.05$  in either the standard method or BOLT-LMM.

<sup>^^</sup> Standard method accounts for population stratification by taking the residuals of the exposure and outcome variables for standard linear regression using 9 covariates (age, sex, assessment centre location, 5 (within UK) ancestry principal components and microarray used to measure genotypes. These residualised variables were then inverse normalised.

<sup>^^^</sup> The BOLT-LMM approach uses a linear mixed models methodology and corrects for all levels of inter-individual correlation of genotypes due to relatedness, from close relatives to cryptic relatedness caused by population stratification. We inverse normalised the socioeconomic status measures, then took the residuals using 3 covariates (age, sex, assessment centre location) and then inverse normalised again. Dichotomous traits were also tested using BOLT-LMM and consistent p-values were observed, but were not reported here due to the differences in the BOLT-LMM model for handling dichotomous traits.

## **Supplementary Figures**

Supplementary figure A: Forest plots of the observational and genetic associations between a 1SD higher height and socioeconomic status: I) Age completed full time education; II) degree education; III) Job class; IV) Income; V) Townsend deprivation index. The plots display the observational association (Observational) and the genetic association using instrumental variable analysis with the genetic risk score (Genetic-instrumental variables). Higher and lower socioeconomic status are marked on the forest plots as higher SES and lower SES.

Supplementary figure B: Forest plots of the observational and genetic associations between a 1SD higher BMI and socioeconomic status: I) Age completed full time education; II) degree education; III) Job class; IV) Income; V) Townsend deprivation index. The plots display the observational association (Observational) and the genetic association using instrumental variable analysis with the genetic risk score (Genetic-instrumental variables). Higher and lower socioeconomic status are marked on the forest plots as higher SES and lower SES.

Supplementary figure A:

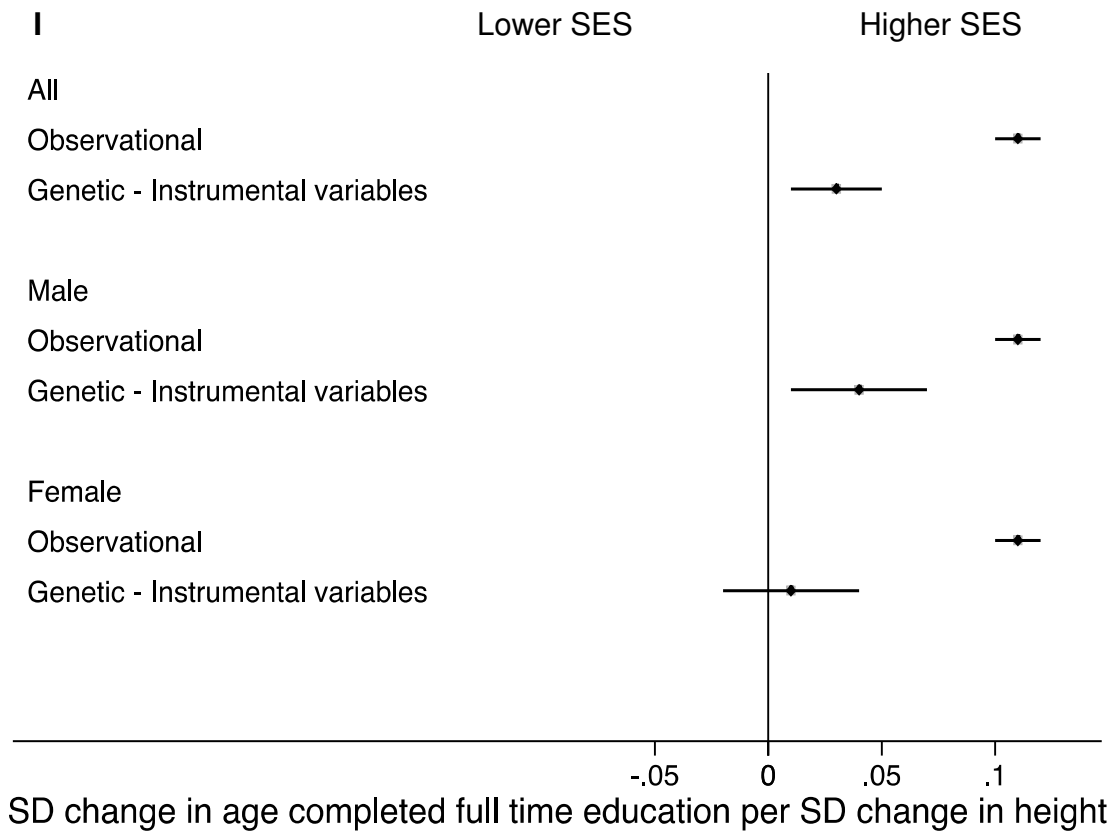

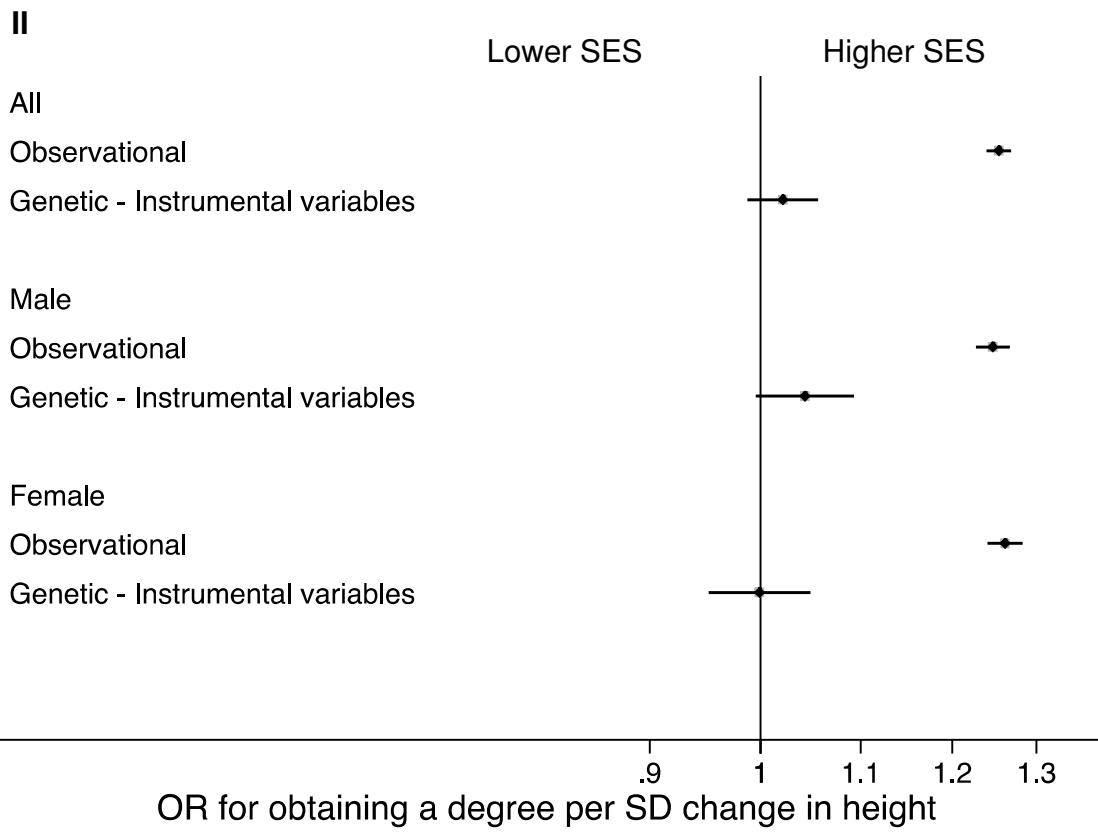

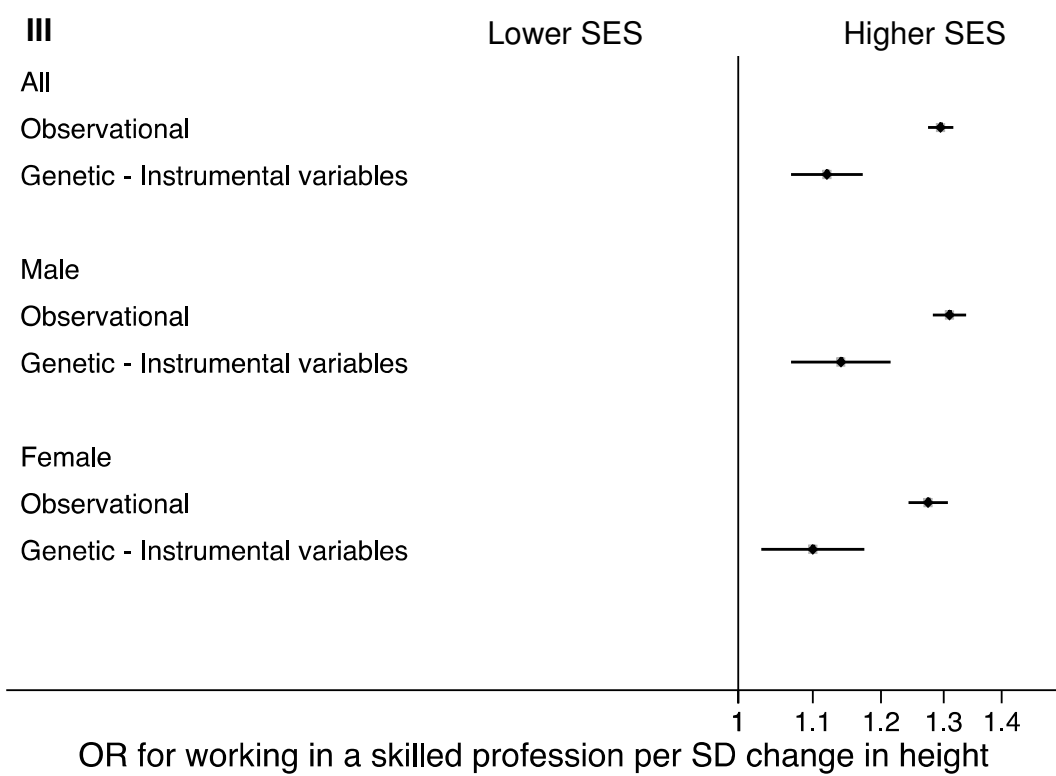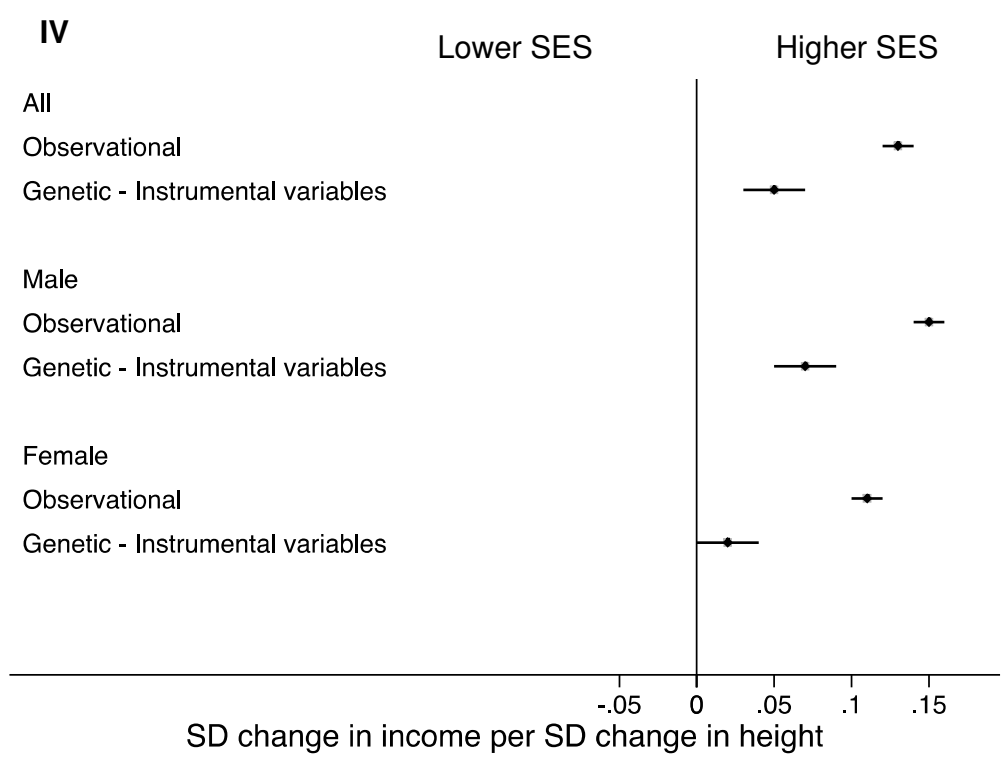

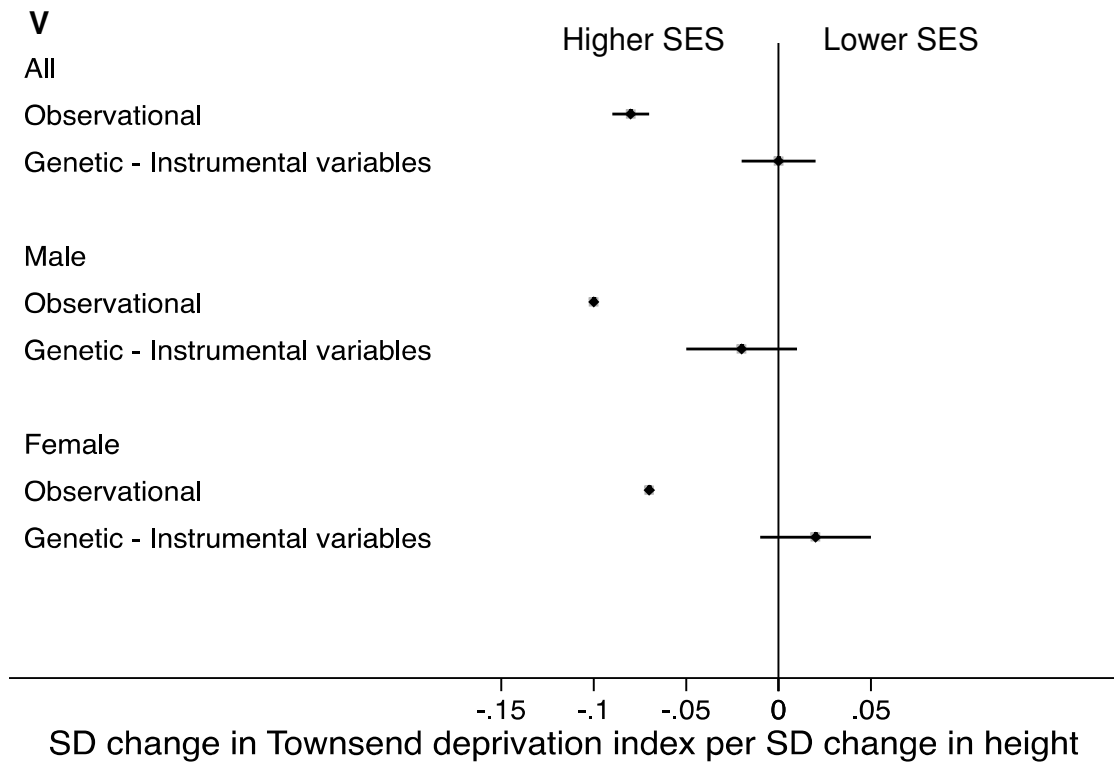



**Supplementary figure B:**

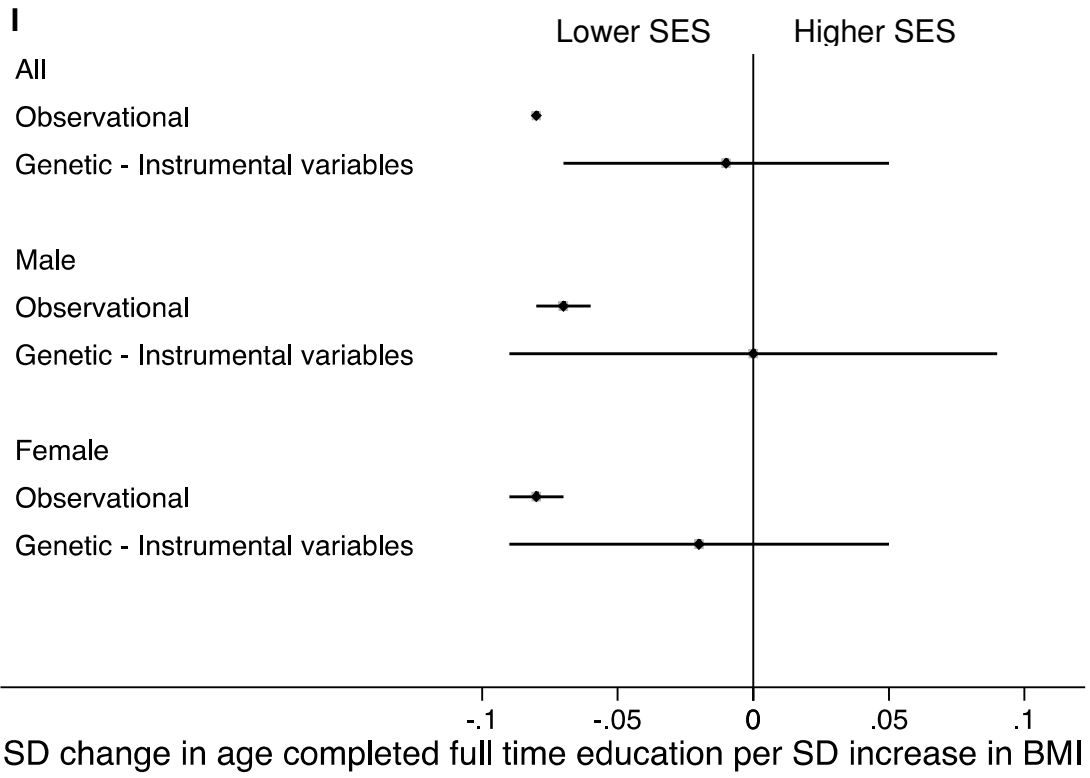

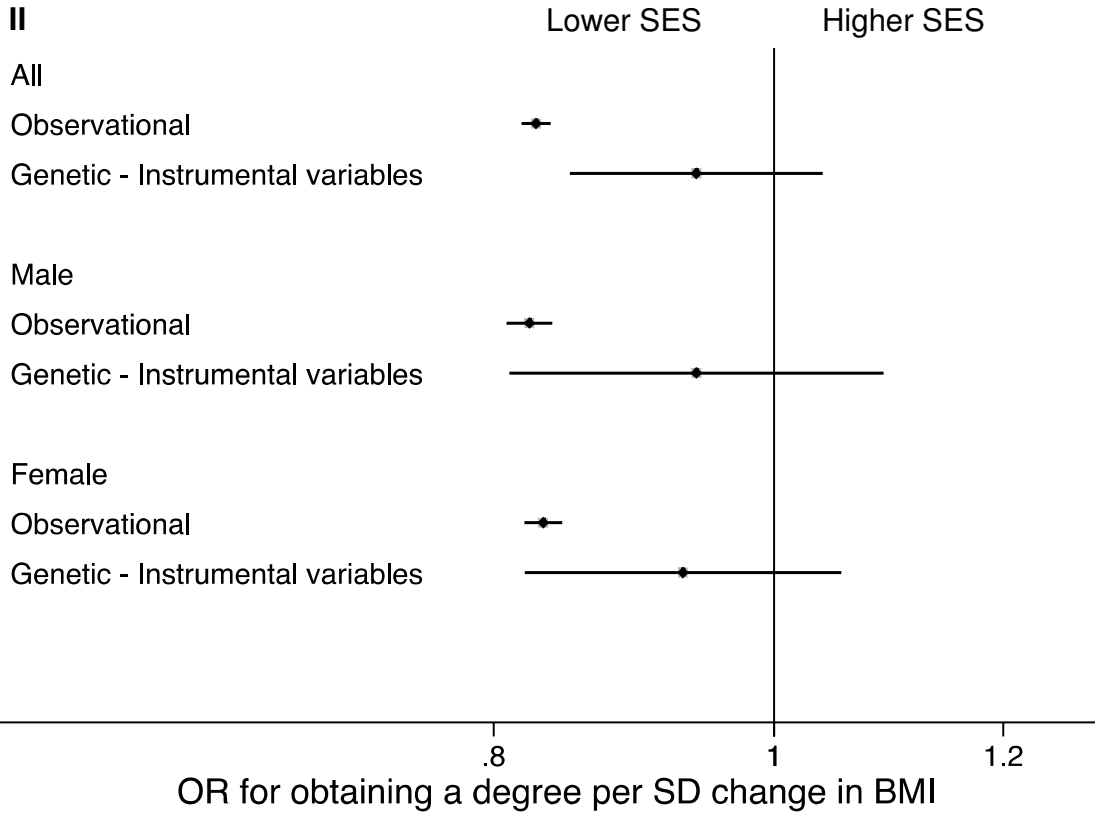

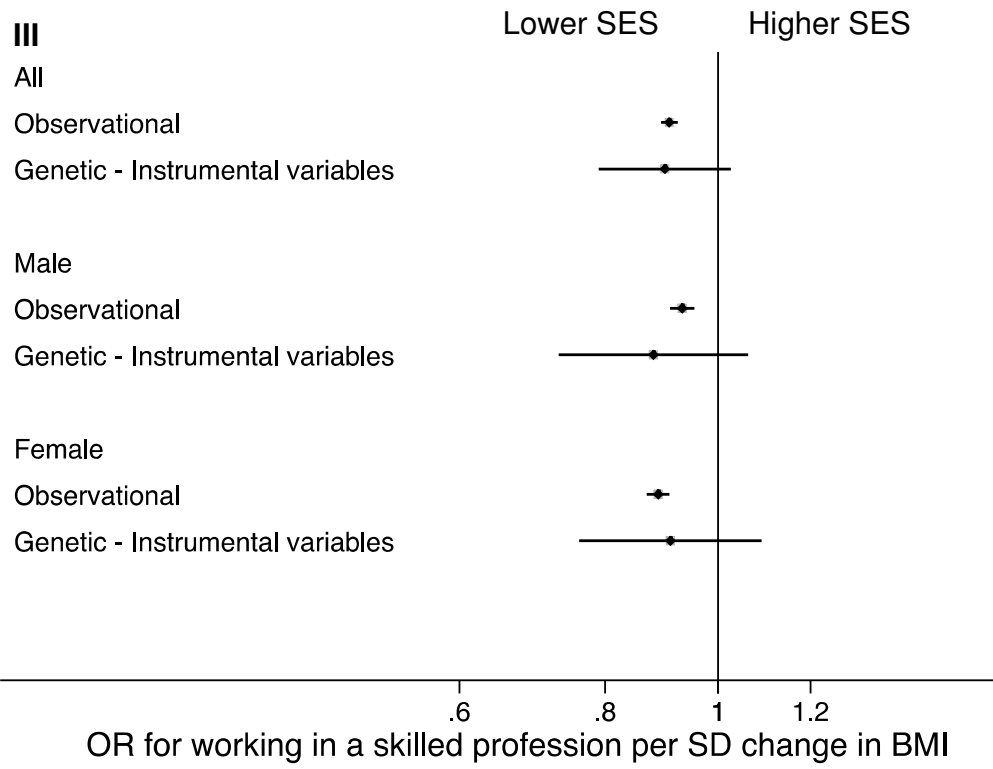

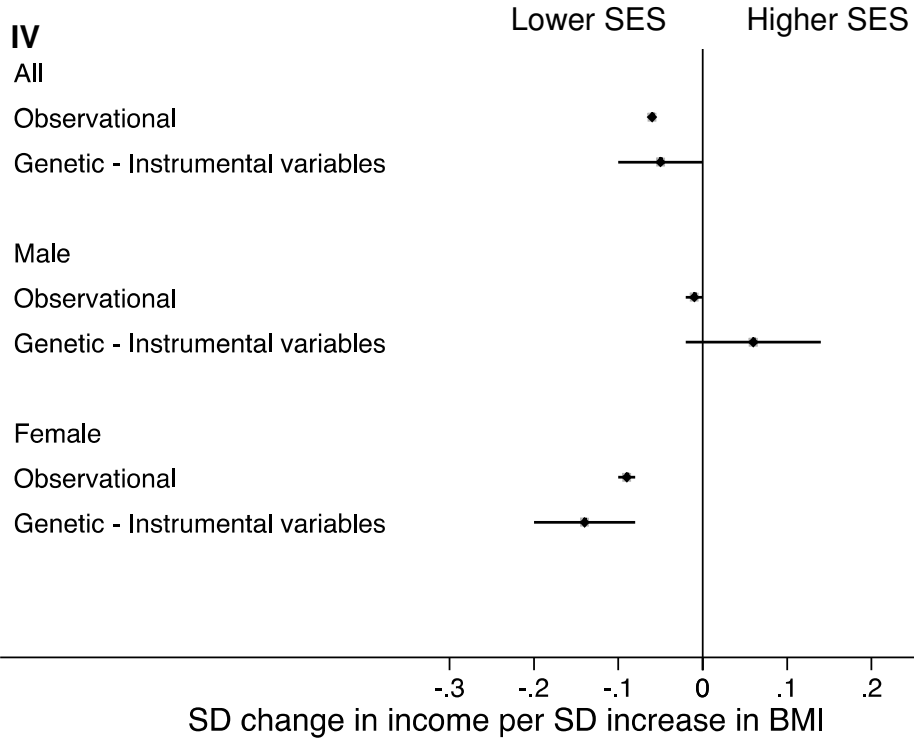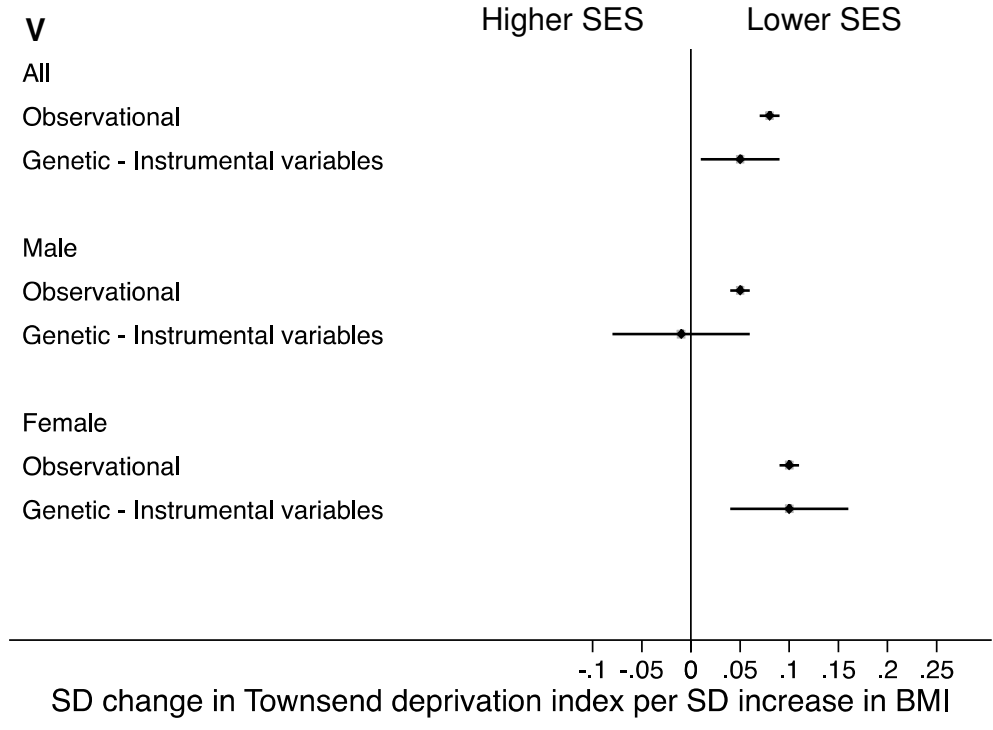

### Supplementary references

1. G. Abraham, M. Inouye, Fast principal component analysis of large-scale genome-wide data. *PLoS One* **9**, e93766 (2014).
2. P. R. Loh *et al.*, Efficient Bayesian mixed-model analysis increases association power in large cohorts. *Nature genetics* **47**, 284-290 (2015).
